# Supplementary material
Source: PubMed Central journal article supplement (PMC3800993)
Supplement: 1306070110_sapp.pdf [file 1306070110_sapp.pdf]

## Supplementary Methods

### Animals:

All animal protocols were in accordance with APLAC, the Stanford IACUC. Germ-free (GF) C57BL/6J (Jackson Labs stock number 000664) mice were singly housed and maintained in gnotobiotic isolators on a strict 12h light cycle. Conventionally housed *Fut2*<sup>-/-</sup> mice (B6.129X1-Fut2tm1Sdo/J; backcrossed 12 generations with C57BL/6J) were delivered by Caesarean section and maintained in gnotobiotic isolators (1). Eight week old GF mice were humanized by oral gavage of 200µl of human fecal sample prepared by mixing stored frozen human fecal sample obtained from a healthy anonymous donor (male, age 38, American diet) with filter-sterilized pre-reduced phosphate buffered saline. Mice were fed autoclaved polysaccharide rich standard (SD) diet (Purina LabDiet 5K67) or an irradiated custom diet containing 68% glucose w/v, 18% protein w/v and 7% fat w/v (Bio-Serv, <http://bio-serv.com>). Fresh fecal samples were collected while mice were on the polysaccharide-rich SD diet or the glucose-rich PD diet and stored at -80°C till further processing. For quantitative RT-PCR, cecal contents were collected from humanized mice on PD diet at the time of sacrifice and stored at -80°C.

For mono-colonization, seven week old GF *Fut2*<sup>+</sup> and *Fut2*<sup>-</sup> mice were each inoculated with 10<sup>8</sup> CFU of *Bacteroides thetaiotaomicron* strain VPI-5482 (ATCC 29148) from an overnight culture grown in tryptone-yeast extract-glucose (TYG) medium. Animals were kept on either the polysaccharide-rich SD diet (*Fut2*<sup>+</sup> n=5, *Fut2*<sup>-</sup>, n=4) or the PD diet (*Fut2*<sup>+</sup> n=4, *Fut2*<sup>-</sup>, n=4). Animals were sacrificed 10 days later and cecal contents including mucus were placed in a tube with 2-3 volumes of RNA Protect (Qiagen, [www.qiagen.com](http://www.qiagen.com)). The solution was mixed by vortexing and then centrifuged (3,000 x g for 20 min at 23°C). The resulting pellet was resuspended in 1 mL of TE buffer (10 mM Tris, 1mM EDTA, pH 8.0) containing 1 mg/mL of lysozyme (specific activity 50,000U/mg; Sigma, [www.sigma-aldrich.com](http://www.sigma-aldrich.com)) and total RNA was

Kashyap et al.

isolated (RNeasy Midi kit from Qiagen; yield=50-200 g/cecum). Genomic DNA was removed by treatment with DNAfree (Ambion; [www.ambion.com](http://www.ambion.com)).

## GeneChip analyses

Custom Affymetrix *B. thetaiotaomicron* GeneChips have been described in earlier publications (2) and were based on the finished genome of *B. thetaiotaomicron* VPI-5482 (3). Results were visualized using DNA- Chip analyzer v1.3 (dChip; [www.biostat.harvard.edu/complab/dchip/](http://www.biostat.harvard.edu/complab/dchip/)). Comparisons were performed on specified GeneChip datasets to identify differentially expressed using the following criteria: 'upregulated' defined as fold change > 1.2 and a false discovery rate (FDR) of 7.5%. Among the upregulated genes, only genes with a q value less than 5% were considered significant. We also included in the up-regulated gene list those genes that were a part of a PUL (defined as containing at least one SusC/D homolog) with at least two members of the locus with q value less than 5%. Additional members of such PUL were included as being significant with q value less than 7%. All GeneChip data have been deposited in the Gene Expression Omnibus (GEO) database ([www.ncbi.nlm.nih.gov/projects/geo](http://www.ncbi.nlm.nih.gov/projects/geo)).

To profile the *B. thetaiotaomicron* transcriptome *in vivo*, cDNA targets were prepared from 5-10 g aliquots of each RNA sample using protocols described in the *E. coli* Antisense Genome Array manual (Affymetrix). RNA was reverse-transcribed using Superscript-II RT (Invitrogen). The RNA template was destroyed by incubation with 0.25 N NaOH for 30 min at 65°C. The cDNA product was isolated (QiaQuick Spin columns; Qiagen), fragmented (DNase-I; [www1.amershambiosciences.com](http://www1.amershambiosciences.com)), and biotinylated (Enzo-BioArray Terminal Labeling Kit). Standard Affymetrix protocols were used for hybridization of the cDNA targets to each *B. thetaiotaomicron* GeneChip. GeneChip data of the bacterial response to the studied diets and host genotypes

were normalized using R program by RMA-MS (4), and the statistical significance of observed differences in *B. thetaiotaomicron* gene expression was determined using SAM (5).

**Culture conditions for *Bacteroides thetaiotaomicron*:** An inoculum from overnight growth of *B. thetaiotaomicron* VPI5482 in TYG medium was added to minimal medium (MM) with specific carbon source. MM contained 100mM KH<sub>2</sub>PO<sub>4</sub> (pH 7.2), 15mM NaCl, 8.5mM (NH<sub>4</sub>)<sub>2</sub>SO<sub>4</sub>, 4mM L- cysteine, 1.9μM hematin/200μM L-histidine (prepared together as a 1,000x solution), 100μM MgCl<sub>2</sub>, 1.4μM FeSO<sub>4</sub>·7H<sub>2</sub>O, 50μM CaCl<sub>2</sub>, 1μg/mL vitamin K<sub>3</sub>, and 5ng/mL vitamin B<sub>12</sub>. All carbon sources were added to MM [final concentration 0.5% (w/v)]. Media were filter sterilized using a Millipore Express filter unit (0.22μm pore diameter). 2' fucosyl-lactose, 3'fucosyl- lactose, lacto-difucose were purchased from GlycoTech; lacto-N-tetraose, lacto-fucopentaose, lacto-N-difucohexaose were purchased from Accurate Chemical & Scientific Corp. Other monosaccharides and disaccharides were purchased from Sigma.

**Genotyping:** Mouse genomic DNA was prepared from ear tissue obtained by ear punch. PCR amplification using three primers F: 5'CCTGCCATGCTTTCTTTCCTG3' R: 5'ATTCCTTCTCTGACAGGGTTTGG3' (WT), 5'TGGGTAACGCCAGGGTTTTC3' yielded either a 191bp band (KO) or 154 bp band (WT) or both (HT).

**Quantitative RT-PCR analysis** Quantitative RT-PCR was performed using gene-specific primers with SYBR Green (ABgene) in a MX3000P thermocycler (Stratagene). For *in vitro* studies using *B. thetaiotaomicron* in minimal medium supplemented with glucose or pure glycan, experiments were performed in triplicate and the results reported are mean values ± SEM. Primer pairs used were (i) BT1273F 5'TGCGGAGACAATGGATATGA3', BT1273R 5'ACATCGCGTCCGTAAATACC 3' and (ii) BT4247F 5'CGGTACCCAAAAGAAGGTCA3' and BT4247R 5'AAGTACCGATACCGCGAATG3'. For analysis in humanized mice fed a PD diet, cecal contents were collected from 5 Fut2<sup>-</sup> mice and 4 Fut2<sup>+</sup> mice and processed to prepare

cDNA. Primer pairs used were (i) BT4244F 5'TATTCGGCAGTCGGAGATGT3' BT4244R 5' GAATCTCGAAAGTCGTGAAGG3' and (ii) BT4263F 5' GCTGGTATCGCTTTGACTGA3' BT4263R 5' GCGTAACTGATGCCATGTG3'.

**16S rRNA pyrosequencing and data analysis:** After isolation of fecal DNA (MoBio fecal DNA kit), 626 bp amplicons (including a unique 12bp Golay barcode) spanning variable regions 3-5 (V3-V5) were generated from bacterial 16SrRNA genes using barcoded forward primer (338F, 906R). Samples were subjected to multiplex pyrosequencing with a Roche 454 instrument and Titanium chemistry. Post processing of pyrosequencing data was done using QIIME1.4.0.(6). As a first step, sequence data and metadata were combined to de-multiplex the barcoded reads and quality filtering was done using the default parameters in QIIME. Sequences were grouped into OTUs (Operational Taxonomic Units) at 97% sequence similarity using uclust. Taxonomy was assigned using RDP classifier against GreenGenes database, sequences were aligned and phylogenetic tree was built from reference sequences using FastTree. An OTU table showing counts of each OTU in each sample was produced. To control for the sequencing effort, OTU table was rarified at a single sequencing depth of 2000 sequences/fecal sample for samples obtained from time points D28 and D56. KEGG-level imputed metagenomic analysis was performed using PiCRUST (<http://picrust.github.com>). CAZY GH assignments(7) were made using an HMM (hidden Markov model) database(8) and a local database of 2770 fully sequenced genomes. Samples from the 4 weekly time points D29-D56 were run on a different 454 run and the OTU table generated was rarified at a sequencing depth of 500 sequences/sample.(9, 10)

Alpha diversity was determined using Shannon and Chao1 index and is represented as rarefaction curves. Beta diversity was determined using unweighted UniFrac (11) and the results presented as principal coordinate axis (PCoA) plots. The OTU's were summarized at different taxonomic levels from

phylum to genus and differences in the relative abundance at different taxonomic levels were determined using ANOVA with a false discovery rate of 5%.

**Non-targeted UPLC-MS metabolic profiling of urine and feces:** Fecal samples were extracted using OASIS solid phase extraction cartridges. Samples were mixed 1:1 with acetonitrile and 5  $\mu$ L of sample was used. Chromatographic separation was performed in ACQUITY Ultra performance Liquid Chromatography system. Mass spectrometry was performed on Exactive (Thermo Fisher) operated in positive electrospray mode. The instrument was mass calibrated with a solution containing dodecyl sulfate ( $m/z$  265), sodium taurocholate ( $m/z$  514) and Ultramark 1621 ( $m/z$  1280, 1380, 1480, 1580, 1680, 1780). Data was collected in continuous mode. The web-based program MetaboAnalyst was used for statistical analysis ([www.metaboanalyst.ca](http://www.metaboanalyst.ca)).

**Sparse canonical correlation analysis:** The following transformations were made in order to make the analysis more robust: Only OTU's that were present at the level of at least 2 reads in more than three samples were retained. A robust thresholding method was used setting to 50 all read numbers larger than 50. Similarly for metabolites, if a feature had a value of 0 in more than 4 samples it was excluded from the analysis. For those with less than 4 zeros, these 0 were retained, but all other values were given a log transformation. A standard log ( $X+1$ ) transformation was done to account for values which may be zero. The transformed data were then subjected to a sparse canonical correlation analysis with a penalty of 0.15, providing a set of non-zero coefficients.

**Accession Numbers:** GeneChip datasets have been deposited in the Gene Expression Omnibus (GEO; <http://www.ncbi.nlm.nih.gov/geo/>) under accession numbers GSE45641. The 16S sequence data has been deposited in the European Molecular Biology Laboratory (EMBL)

Nucleotide Archive with accession number ERP003630, and can also be found in the QIIME Database under the study ID 1452. (<http://www.microbio.me/qiime/>).

## Supplemental Figures

**Fig. S1. Comparison of microbial communities from humanized WT (Fut2<sup>+/+</sup>) and HT (Fut2<sup>+/-</sup>) mice.** (A). Intra-individual and inter-individual differences between gut microbial communities from humanized WT and HT mice on D28. Difference in alpha diversity using the Shannon index (B) and beta diversity using unweighted UniFrac distance metric (C) between WT and HT mice.

**Fig. S2. Effect of gut mucus fucosylation on alpha diversity of a human microbiota transplanted into gnotobiotic mice fed a plant polysaccharide-rich standard diet.**

Rarefaction curves using Chao1 measure of alpha diversity in fecal samples obtained from humanized Fut2<sup>+</sup> (n=18) and Fut2<sup>-</sup> (n=10) animals.

**Fig. S3. Effect of diet on the metabolic profiles present in urine and feces recovered from Fut2<sup>+</sup> and Fut2<sup>-</sup> mice.** Volcano plot showing metabolites that are significantly higher (>2 fold change and p<0.05) in the urine (A, B) or feces (C, D) of humanized Fut2<sup>+</sup> and Fut2<sup>-</sup> mice fed a polysaccharide-rich SD diet (A, C) or the glucose-rich PD (B, D) diet.

**Fig. S4. PCoA and Procrustes analysis of V3-5 16S rRNA and fecal metabolites.** Two circles connected by a line represent the two different data types from the same fecal sample. The overall goodness of fit ( $M^2$ ) for the different data types is 0.346 (p<0.05)

**Fig. S5. Sparse canonical correlation analyses of fecal OTU's and metabolites.** Biplot showing the output from a principal component analysis (PCA) performed on the reduced set of combined metabolomic features (green arrows and labels) and OTU's (purple arrows and labels)

corresponding to the family or genera of these OTU's) within fecal samples from humanized mice that were chosen by the sparse Canonical Correlation Analysis. The two linear combinations of variables had a correlation of 0.987. The PCA biplot of the first principal plane presents 96% of the variance of this reduced set of variables.

**Fig. S6. Effect of diet and genotype on host mucin glycan GH representation in imputed community metagenome and microbial community composition.** (A) Enrichment of 8 GH families associated with mucin glycan degradation were determined to illustrate effect of diet (left) and genotype (right). 5 GHs (FDR < 0.05) are significantly enriched in humanized Fut2+ mice on PD diet as compared to SD diet while no GH's are significantly different in humanized Fut2- mice on PD diet as compared to SD diet. 6 GHs (FDR < 0.05) are enriched in humanized Fut2- mice on SD diet as compared to Fut2+ mice while no GH's are significantly different in Fut2- mice on PD diet as compared to Fut2+mice. Ranges represent percent change in GH copy numbers between communities; solid boxes denote FDR < 0.05. (B) Pairwise comparisons (dotted line) of the mean percent of mucin-associated GH copy numbers in panel A are plotted as a function of diet and mean mucin-associated GH percent increase. Greek letters correspond to panel A to indicate comparisons. (C) Significant ( $p < 0.05$ ; ANOVA, FDR < 5%) genus level differences in gut microbial communities of humanized Fut2+ mice on the plant polysaccharide-rich SD diet (D28; n=18) compared to the PD diet (D56; n=9). These genera were not significantly different in humanized Fut2- mice on SD diet compared with PD diet. Data are shown as averages  $\pm$  SEM. \* $P < 0.05$

## References

1. Domino SE, Zhang L, Gillespie PJ, Saunders TL, & Lowe JB (2001) Deficiency of reproductive tract alpha(1,2)fucosylated glycans and normal fertility in mice with targeted deletions of the FUT1 or FUT2 alpha(1,2)fucosyltransferase locus. *Molecular and cellular biology* 21(24):8336-8345.
2. Sonnenburg JL, et al. (2005) Glycan foraging in vivo by an intestine-adapted bacterial symbiont. *Science* 307(5717):1955-1959.

3. Xu J, *et al.* (2003) A genomic view of the human-Bacteroides thetaiotaomicron symbiosis. *Science* 299(5615):2074-2076.
4. Stevens JR GB, Desai P, Rajan S, Weimer BC (2008) Statistical issues in the normalization of multi-species microarray data. *Proceedings of Conference on Applied Statistics in Agriculture*:47-62.
5. Tibshirani R (2006) A simple method for assessing sample sizes in microarray experiments. *BMC bioinformatics* 7:106.
6. Caporaso JG, *et al.* (2010) QIIME allows analysis of high-throughput community sequencing data. *Nature methods* 7(5):335-336.
7. Cantarel BL, *et al.* (2009) The Carbohydrate-Active EnZymes database (CAZy): an expert resource for Glycogenomics. *Nucleic Acids Res* 37(Database issue):D233-238.
8. Yin Y, *et al.* (2012) dbCAN: a web resource for automated carbohydrate-active enzyme annotation. *Nucleic Acids Res* 40(Web Server issue):W445-451.
9. Hamady M & Knight R (2009) Microbial community profiling for human microbiome projects: Tools, techniques, and challenges. *Genome research* 19(7):1141-1152.
10. Kuczynski J, *et al.* (2010) Direct sequencing of the human microbiome readily reveals community differences. *Genome biology* 11(5):210.
11. Lozupone C, Hamady M, & Knight R (2006) UniFrac--an online tool for comparing microbial community diversity in a phylogenetic context. *BMC bioinformatics* 7:371.



# Fig. S1

## A

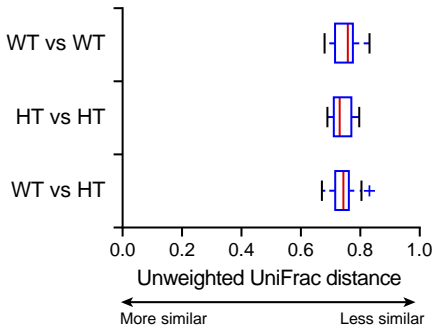

## B

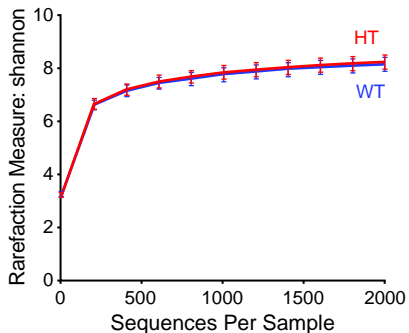

## C

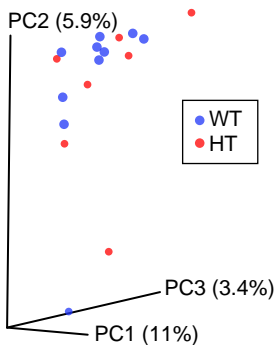

Fig. S2

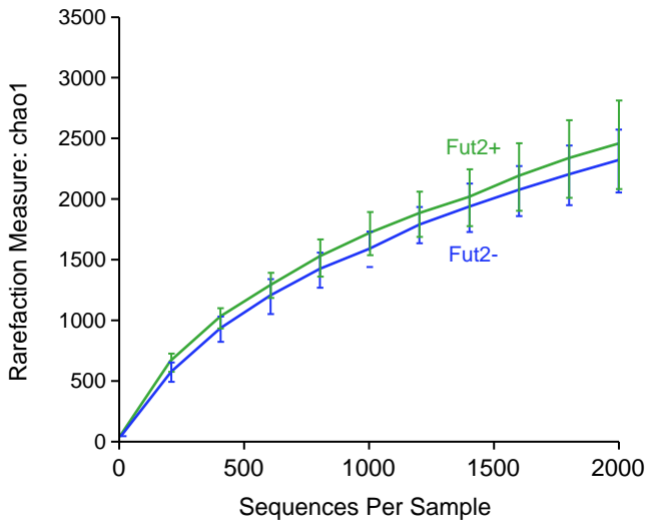

Fig. S3

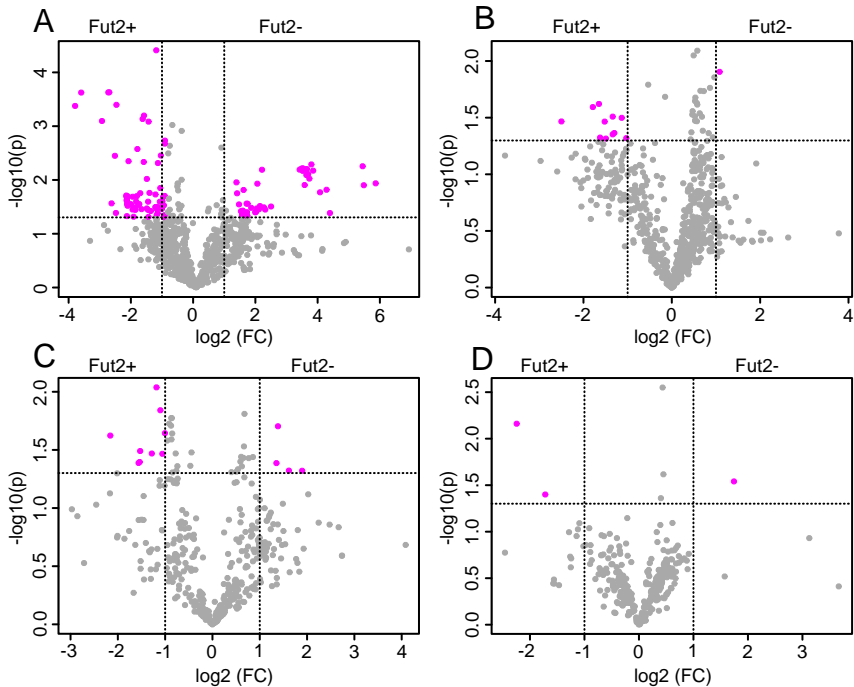

# Fig. S4

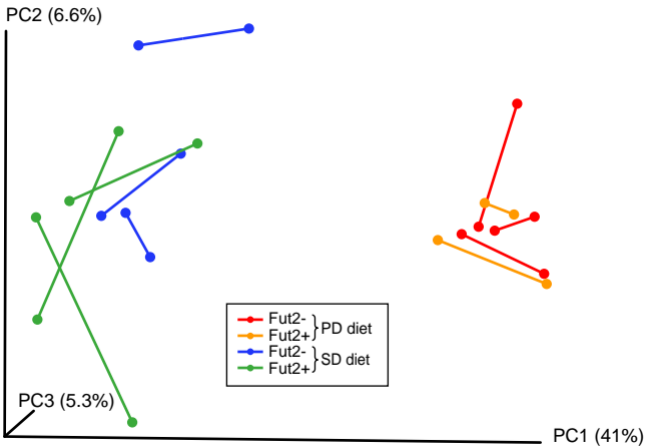

Fig. S5

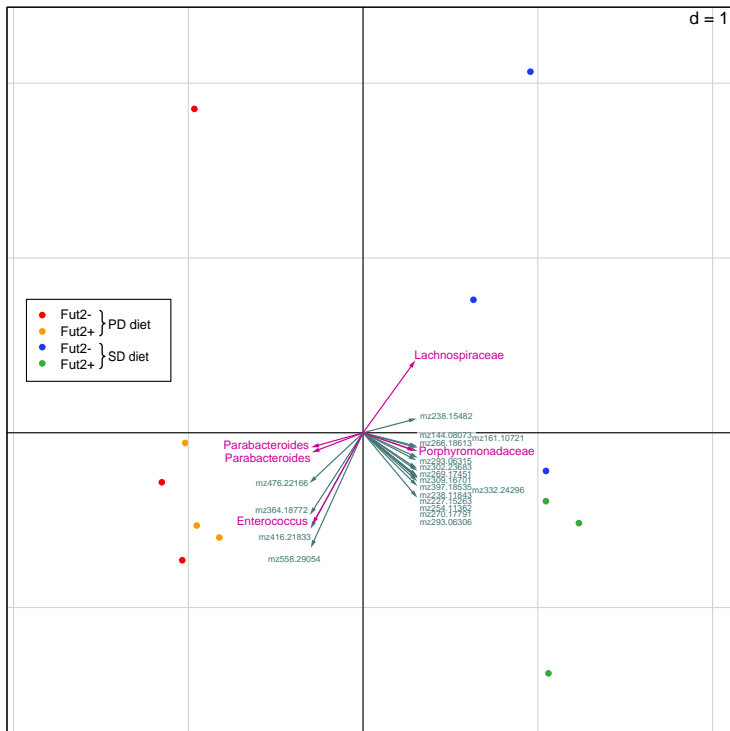

Fig. S6

A.

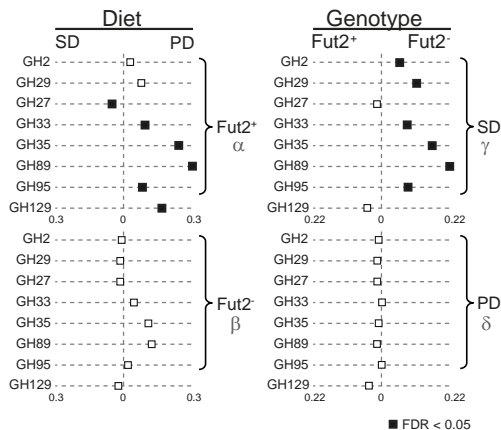

B.

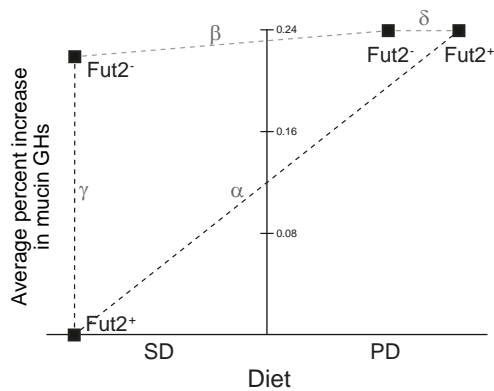

C.

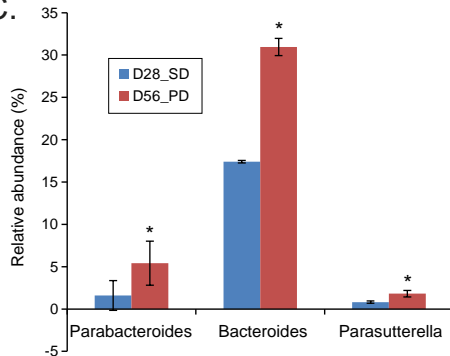

**Table S1. Significant differences (p<0.05 ANOVA with FDR 5%) at different taxonomic levels between microbial communities from Fut2+ and Fut2- mice fed a standard diet.**

|               | Probability | FDR_corrected | Fut2+_mean  | Fut2-_mean | Consensus Lineage                                                                             |
|---------------|-------------|---------------|-------------|------------|-----------------------------------------------------------------------------------------------|
| <b>Phylum</b> |             |               |             |            |                                                                                               |
|               | 0.00152     | 0.00912187    | 0.009529412 | 0.0239     | Bacteria; Proteobacteria                                                                      |
| <b>Class</b>  |             |               |             |            |                                                                                               |
|               | 0.002334    | 0.023344366   | 0.008558824 | 0.0225     | Bacteria; Proteobacteria; Betaproteobacteria                                                  |
| <b>Order</b>  |             |               |             |            |                                                                                               |
|               | 0.002078    | 0.022857569   | 0.008441176 | 0.02235    | Bacteria; Proteobacteria; Betaproteobacteria; Burkholderiales                                 |
| <b>Family</b> |             |               |             |            |                                                                                               |
|               | 0.0003      | 0.005405692   | 0.002264706 | 0.00575    | Bacteria; Firmicutes; Clostridia; Clostridiales; Eubacteriaceae                               |
|               | 0.001873    | 0.016860252   | 0.008176471 | 0.022      | Bacteria; Proteobacteria; Betaproteobacteria; Burkholderiales; Alcaligenaceae                 |
|               | 0.004849    | 0.02181938    | 0.174058824 | 0.2651     | Bacteria; Bacteroidetes; Bacteroidia; Bacteroidales; Bacteroidaceae                           |
|               | 0.004564    | 0.027381968   | 0.105352941 | 0.0453     | Bacteria; Firmicutes; Clostridia; Clostridiales; Other                                        |
| <b>Genus</b>  |             |               |             |            |                                                                                               |
|               | 1.96E-05    | 0.000665703   | 0.016029412 | 0.03055    | Bacteria; Bacteroidetes; Bacteroidia; Bacteroidales; Porphyromonadaceae; Parabacteroides      |
|               | 0.000269    | 0.004577942   | 0.002205882 | 0.00575    | Bacteria; Firmicutes; Clostridia; Clostridiales; Eubacteriaceae; Eubacterium                  |
|               | 0.001873    | 0.021231428   | 0.008176471 | 0.022      | Bacteria; Proteobacteria; Betaproteobacteria; Burkholderiales; Alcaligenaceae; Parasutterella |
|               | 0.004849    | 0.032971508   | 0.174058824 | 0.2651     | Bacteria; Bacteroidetes; Bacteroidia; Bacteroidales; Bacteroidaceae; Bacteroides              |
|               | 0.004564    | 0.038791121   | 0.105352941 | 0.0453     | Bacteria; Firmicutes; Clostridia; Clostridiales; Other; Other                                 |
| <b>OTU</b>    |             |               |             |            |                                                                                               |
|               | 4.83E-08    | 1.90E-05      | 0           | 0.00425    | Bacteria; Firmicutes; Clostridia; Clostridiales; Lachnospiraceae                              |
|               | 4.43E-05    | 0.008736197   | 0.000264706 | 0.0012     | Bacteria; Bacteroidetes; Bacteroidia; Bacteroidales; Bacteroidaceae; Bacteroides              |
|               | 0.000438    | 0.024669405   | 0.005735294 | 0.0139     | Bacteria; Bacteroidetes; Bacteroidia; Bacteroidales; Bacteroidaceae; Bacteroides              |
|               | 0.000191    | 0.025023369   | 0.001794118 | 0.00555    | Bacteria; Bacteroidetes; Bacteroidia; Bacteroidales; Porphyromonadaceae; Parabacteroides      |
|               | 0.000573    | 0.025072956   | 0.000647059 | 0.00225    | Bacteria; Bacteroidetes; Bacteroidia; Bacteroidales                                           |
|               | 0.000649    | 0.025586788   | 0.000235294 | 0.0012     | Bacteria; Bacteroidetes; Bacteroidia; Bacteroidales; Porphyromonadaceae; Parabacteroides      |
|               | 0.000527    | 0.025967852   | 8.82E-05    | 0.00065    | Bacteria; Firmicutes                                                                          |
|               | 0.00043     | 0.02821245    | 0.018705882 | 0.00405    | Bacteria; Bacteroidetes; Bacteroidia; Bacteroidales; Bacteroidaceae; Bacteroides              |
|               | 0.000309    | 0.030431163   | 0.001235294 | 0.00395    | Bacteria; Firmicutes; Clostridia; Clostridiales; Eubacteriaceae; Eubacterium                  |
|               | 0.000407    | 0.032105316   | 0.002029412 | 0.00515    | Bacteria; Bacteroidetes; Bacteroidia; Bacteroidales; Bacteroidaceae; Bacteroides              |
|               | 0.001097    | 0.036027909   | 0.001705882 | 0.0064     | Bacteria; Proteobacteria; Betaproteobacteria; Burkholderiales; Alcaligenaceae; Parasutterella |
|               | 0.001077    | 0.038562643   | 0.000794118 | 0.0023     | Bacteria; Bacteroidetes; Bacteroidia; Bacteroidales; Porphyromonadaceae; Parabacteroides      |
|               | 0.001586    | 0.041665937   | 5.88E-05    | 0.0005     | Bacteria; Bacteroidetes; Bacteroidia; Bacteroidales; Bacteroidaceae; Bacteroides              |
|               | 0.001409    | 0.042705377   | 0.040323529 | 0.09035    | Bacteria; Bacteroidetes; Bacteroidia; Bacteroidales; Bacteroidaceae; Bacteroides              |
|               | 0.001557    | 0.043815828   | 8.82E-05    | 0.0005     | Bacteria; Proteobacteria; Betaproteobacteria; Burkholderiales; Alcaligenaceae; Parasutterella |

|  |          |             |             |         |                                                                                               |
|--|----------|-------------|-------------|---------|-----------------------------------------------------------------------------------------------|
|  | 0.001823 | 0.044883368 | 0.000941176 | 0.0032  | Bacteria; Bacteroidetes; Bacteroidia; Bacteroidales; Bacteroidaceae; Bacteroides              |
|  | 0.002165 | 0.047395583 | 0.000147059 | 0.00065 | Bacteria; Firmicutes; Clostridia; Clostridiales; Eubacteriaceae; Eubacterium                  |
|  | 0.002478 | 0.048807318 | 0.000823529 | 0.0037  | Bacteria; Firmicutes; Clostridia; Clostridiales; Lachnospiraceae                              |
|  | 0.002109 | 0.048880602 | 0.000205882 | 0.00085 | Bacteria; Bacteroidetes; Bacteroidia; Bacteroidales; Porphyromonadaceae; Parabacteroides      |
|  | 0.002608 | 0.048926647 | 8.82E-05    | 0.00045 | Bacteria; Proteobacteria; Betaproteobacteria; Burkholderiales; Alcaligenaceae; Parasutterella |
|  | 0.002739 | 0.049047896 | 0.001941176 | 0.0004  | Bacteria; Bacteroidetes; Bacteroidia; Bacteroidales; Bacteroidaceae; Bacteroides              |
|  |          |             |             |         |                                                                                               |



**Table S2. Significantly different ( $p < 0.05$ , t-test and  $> 2$ -fold change) masses for urinary metabolites between humanized Fut2<sup>+</sup> and Fut2<sup>-</sup> mice on standard diet.**

| <b>Fut2<sup>+</sup> &gt;<br/>Fut2<sup>-</sup></b> |                        |                |  | <b>Fut2<sup>-</sup> &gt;<br/>Fut2<sup>+</sup></b> |                        |                |
|---------------------------------------------------|------------------------|----------------|--|---------------------------------------------------|------------------------|----------------|
| <b>m/z</b>                                        | <b>Fold<br/>change</b> | <b>p.value</b> |  | <b>m/z</b>                                        | <b>Fold<br/>change</b> | <b>p.value</b> |
| 435.1346                                          | 14.82206               | 0.000426       |  | 304.1265                                          | 2.4523                 | 0.011232       |
| 452.1552                                          | 12.92908               | 0.00024        |  | 213.1118                                          | 2.488                  | 0.017927       |
| 174.1122                                          | 8.145312               | 0.000812       |  | 145.1319                                          | 2.5966                 | 0.028848       |
| 453.1602                                          | 7.068137               | 0.000239       |  | 76.03983                                          | 2.7112                 | 0.038639       |
| 259.1043                                          | 6.92329                | 0.000237       |  | 192.7746                                          | 2.7731                 | 0.045969       |
| 466.1308                                          | 6.582845               | 0.02759        |  | 194.0808                                          | 2.8131                 | 0.038574       |
| 191.1389                                          | 6.105752               | 0.003602       |  | 195.0841                                          | 2.822                  | 0.037612       |
| 360.1283                                          | 5.969793               | 0.041582       |  | 168.1125                                          | 2.8726                 | 0.015532       |
| 175.1154                                          | 5.905628               | 0.000406       |  | 234.0348                                          | 2.8731                 | 0.047054       |
| 471.0533                                          | 4.738438               | 0.019736       |  | 225.123                                           | 2.9064                 | 0.045781       |
| 469.0564                                          | 4.72858                | 0.020539       |  | 233.04                                            | 2.9941                 | 0.049013       |
| 447.0744                                          | 4.712535               | 0.024184       |  | 91.05376                                          | 3.0511                 | 0.040921       |
| 410.1048                                          | 4.674863               | 0.047657       |  | 212.1107                                          | 3.0737                 | 0.027905       |
| 331.0445                                          | 4.657662               | 0.028504       |  | 239.1385                                          | 3.0955                 | 0.047108       |
| 449.0702                                          | 4.649649               | 0.025051       |  | 240.1413                                          | 3.1016                 | 0.040376       |
| 470.06                                            | 4.64792                | 0.021516       |  | 263.1166                                          | 3.1275                 | 0.047144       |
| 448.0784                                          | 4.60278                | 0.03056        |  | 211.1073                                          | 3.1449                 | 0.028048       |
| 262.9998                                          | 4.598124               | 0.02043        |  | 209.6259                                          | 3.4104                 | 0.033369       |
| 219.1685                                          | 4.512635               | 0.004535       |  | 388.158                                           | 3.7346                 | 0.040371       |
| 222.4212                                          | 4.306076               | 0.028567       |  | 286.1038                                          | 3.7467                 | 0.040291       |
| 171.1012                                          | 4.27899                | 0.02891        |  | 387.1546                                          | 3.8016                 | 0.039279       |
| 227.0394                                          | 4.120992               | 0.035893       |  | 425.1107                                          | 3.8648                 | 0.034212       |
| 261.9964                                          | 4.111166               | 0.020773       |  | 224.0783                                          | 3.9069                 | 0.011878       |
| 228.0774                                          | 4.027386               | 0.048876       |  | 214.1182                                          | 4.0405                 | 0.035541       |
| 178.0327                                          | 4.011714               | 0.035175       |  | 216.0627                                          | 4.1418                 | 0.030927       |
| 226.0364                                          | 4.003203               | 0.034752       |  | 222.0435                                          | 4.3324                 | 0.00654        |
| 225.0438                                          | 3.986446               | 0.034657       |  | 410.1401                                          | 4.523                  | 0.032767       |
| 176.0374                                          | 3.968569               | 0.032778       |  | 409.1366                                          | 4.6577                 | 0.035993       |
| 224.0406                                          | 3.90564                | 0.035068       |  | 404.1812                                          | 5.302                  | 0.031565       |
| 224.0484                                          | 3.875518               | 0.036416       |  | 304.1273                                          | 10.023                 | 0.006513       |
| 240.1419                                          | 3.800836               | 0.025479       |  | 141.0181                                          | 10.441                 | 0.006248       |
| 277.0944                                          | 3.750938               | 0.020249       |  | 302.1227                                          | 10.723                 | 0.006863       |
| 294.1444                                          | 3.703978               | 0.002693       |  | 207.0513                                          | 10.746                 | 0.006141       |
| 177.0412                                          | 3.630818               | 0.029946       |  | 307.0783                                          | 11.196                 | 0.012585       |
| 184.0965                                          | 3.55101                | 0.028463       |  | 303.1264                                          | 11.488                 | 0.006376       |
| 239.1388                                          | 3.476326               | 0.017856       |  | 299.5889                                          | 11.643                 | 0.00821        |
| 241.0683                                          | 3.375869               | 0.035388       |  | 206.0479                                          | 11.78                  | 0.00637        |
| 298.1473                                          | 3.296631               | 0.000745       |  | 211.0033                                          | 12.102                 | 0.007884       |

|          |          |          |  |          |        |          |
|----------|----------|----------|--|----------|--------|----------|
| 335.1023 | 3.212748 | 0.004688 |  | 228.0321 | 12.437 | 0.009551 |
| 308.1607 | 3.194684 | 0.000643 |  | 223.0744 | 13.009 | 0.005211 |
| 246.0261 | 3.00102  | 0.034268 |  | 249.0754 | 13.534 | 0.006797 |
| 279.0827 | 2.997422 | 0.009688 |  | 316.1385 | 15.773 | 0.017183 |
| 322.1854 | 2.917238 | 0.036558 |  | 323.0522 | 18.238 | 0.015398 |
| 284.1962 | 2.915622 | 0.025691 |  | 500.1525 | 19.667 | 0.041713 |
| 190.1799 | 2.894188 | 0.049183 |  | 428.1154 | 40.738 | 0.005635 |
| 297.144  | 2.88542  | 0.000833 |  | 591.1687 | 41.814 | 0.012699 |
| 263.9921 | 2.828454 | 0.017621 |  | 592.1722 | 54.459 | 0.01171  |
| 180.0486 | 2.748385 | 0.038304 |  |          |        |          |
| 236.1489 | 2.477087 | 0.032499 |  |          |        |          |
| 367.1858 | 2.474451 | 0.018857 |  |          |        |          |
| 211.169  | 2.468222 | 0.032442 |  |          |        |          |
| 299.1596 | 2.431197 | 3.93E-05 |  |          |        |          |
| 178.0529 | 2.412487 | 0.045893 |  |          |        |          |
| 290.1957 | 2.402749 | 0.035263 |  |          |        |          |
| 297.144  | 2.387604 | 0.032113 |  |          |        |          |
| 255.1587 | 2.357879 | 0.042363 |  |          |        |          |
| 290.1495 | 2.342579 | 0.004914 |  |          |        |          |
| 298.1485 | 2.24482  | 0.025704 |  |          |        |          |
| 366.159  | 2.22326  | 0.014317 |  |          |        |          |
| 272.1425 | 2.195775 | 0.003558 |  |          |        |          |
| 291.1645 | 2.147766 | 0.035009 |  |          |        |          |
| 311.1301 | 2.144634 | 0.032025 |  |          |        |          |
| 290.1221 | 2.124631 | 0.025069 |  |          |        |          |
| 225.0539 | 2.088511 | 0.021105 |  |          |        |          |
| 156.0652 | 2.056936 | 0.049838 |  |          |        |          |
| 297.1439 | 2.052672 | 0.030004 |  |          |        |          |
| 295.1513 | 2.026178 | 0.045821 |  |          |        |          |
| 208.1805 | 2.01487  | 0.020068 |  |          |        |          |
| 266.1494 | 2.011668 | 0.002138 |  |          |        |          |
| 271.1395 | 2.00449  | 0.001877 |  |          |        |          |

**Table S3. Significantly different ( $p < 0.05$ , t-test and  $> 2$ -fold change) masses for urinary metabolites between humanized Fut2<sup>+</sup> and Fut2<sup>-</sup> mice on PD diet.**

| Fut2 <sup>+</sup> > Fut2 <sup>-</sup> |             |          | Fut2 <sup>-</sup> > Fut2 <sup>+</sup> |             |          |
|---------------------------------------|-------------|----------|---------------------------------------|-------------|----------|
| m/z                                   | Fold Change | p.value  | m/z                                   | Fold Change | p.value  |
| 368.1926756                           | 0.31866     | 0.023852 | 305.1845096                           | 2.1161      | 0.012416 |
| 397.2261072                           | 0.28967     | 0.025419 |                                       |             |          |
| 216.0089013                           | 0.39541     | 0.030865 |                                       |             |          |
| 234.13331                             | 0.4557      | 0.031621 |                                       |             |          |
| 394.1710136                           | 0.17688     | 0.034053 |                                       |             |          |
| 261.1805802                           | 0.34868     | 0.034149 |                                       |             |          |
| 254.1383583                           | 0.4055      | 0.043056 |                                       |             |          |
| 274.12824                             | 0.39552     | 0.044298 |                                       |             |          |
| 396.218109                            | 0.32458     | 0.047254 |                                       |             |          |
| 347.1334156                           | 0.48975     | 0.047778 |                                       |             |          |
| 275.1962316                           | 0.35546     | 0.048227 |                                       |             |          |

**Table S4. Significantly different ( $p < 0.05$ , t-test and  $> 2$ -fold change) masses for fecal metabolites between humanized Fut2<sup>+</sup> and Fut2<sup>-</sup> mice on standard diet.**

| Fut2 <sup>+</sup> > Fut2 <sup>-</sup> |             |          | Fut2 <sup>-</sup> > Fut2 <sup>+</sup> |             |          |
|---------------------------------------|-------------|----------|---------------------------------------|-------------|----------|
| m/z                                   | Fold change | p.value  | m/z                                   | Fold change | p.value  |
| 578.2800263                           | 4.467676362 | 0.023807 | 306.0807789                           | 2.5526      | 0.041072 |
| 427.0880047                           | 2.952116668 | 0.040949 | 174.0385192                           | 2.6114      | 0.019797 |
| 484.1216389                           | 2.904696895 | 0.04015  | 445.2409566                           | 3.0638      | 0.047615 |
| 615.2798424                           | 2.884338044 | 0.032329 | 291.1802804                           | 3.7223      | 0.047764 |
| 241.071466                            | 2.432616522 | 0.033951 |                                       |             |          |
| 266.1384405                           | 2.270920858 | 0.009167 |                                       |             |          |
| 293.0630604                           | 2.145186202 | 0.014425 |                                       |             |          |
| 393.2076553                           | 2.083767452 | 0.034145 |                                       |             |          |
| 232.0968862                           | 2.006621852 | 0.022698 |                                       |             |          |

**Table S5. Significantly different ( $p < 0.05$ , t-test and  $> 2$ -fold change) masses for fecal metabolites between humanized Fut2+ and Fut2- mice on PD diet.**

| Fut2+ > Fut2- |             |          | Fut2- > Fut2+ |             |          |
|---------------|-------------|----------|---------------|-------------|----------|
| m/z           | Fold change | p.value  | m/z           | Fold change | p value  |
| 146.1651207   | 4.737315837 | 0.006904 | 72.08143573   | 3.348       | 0.028815 |
| 393.2364179   | 3.292289458 | 0.039828 |               |             |          |

**Table S6. Discriminatory metabolites based on random Random Forests Classifier between humanized Fut2+ and Fut2- mice on standard diet.**

| m/z      | Mean_decrease_in_accuracy |
|----------|---------------------------|
| 169.0426 | 0.008                     |
| 347.2159 | 0.005333333               |
| 290.1962 | 0.005333333               |
| 94.0450  | 0.004                     |
| 284.2210 | 0.004                     |
| 331.2068 | 0.004                     |
| 244.1543 | 0.003333333               |
| 146.1651 | 0.002666667               |
| 72.0814  | 0.002                     |
| 110.0096 | 0.002                     |
| 128.0191 | 0.002                     |
| 276.1318 | 0.002                     |
| 267.1240 | 0.002                     |
| 310.2253 | 0.002                     |
| 142.0346 | 0.001333333               |
| 86.0606  | 0.001333333               |
| 376.1843 | 0.001333333               |
| 403.1574 | 0.001333333               |
| 229.1434 | 0.001333333               |
| 347.2112 | 0.001333333               |
| 370.2584 | 0.001333333               |
| 266.1387 | 0.001333333               |
| 323.1706 | 0.001333333               |
| 494.2102 | -0.001                    |
| 143.9968 | -0.001333333              |
| 268.1038 | -0.001333333              |
| 319.1628 | -0.001333333              |
| 385.1511 | -0.001333333              |
| 303.1708 | -0.001333333              |
| 248.1354 | -0.001333333              |
| 430.2033 | -0.001333333              |
| 319.1661 | -0.001333333              |
| 281.1922 | -0.001333333              |
| 230.1188 | -0.001333333              |
| 526.3237 | -0.001333333              |
| 220.1544 | -0.001333333              |
| 149.0721 | -0.001333333              |
| 123.0807 | -0.001333333              |
| 318.2013 | -0.001333333              |
| 592.3222 | -0.001333333              |
| 173.1547 | -0.001333333              |
| 282.1550 | -0.002                    |
| 140.0023 | -0.002                    |

|          |              |
|----------|--------------|
| 171.9916 | -0.002       |
| 354.2022 | -0.002       |
| 231.1591 | -0.002       |
| 346.1851 | -0.002       |
| 252.1883 | -0.002       |
| 164.1363 | -0.002       |
| 235.1543 | -0.002       |
| 492.2360 | -0.002       |
| 511.3129 | -0.002       |
| 285.9691 | -0.002       |
| 591.3183 | -0.002       |
| 308.2059 | -0.002666667 |
| 270.1099 | -0.004       |

**Table S7. Imputed genes from the microbial communities of mice on SD and PD diets at KEGG level 2.**

| <b>KEGG Level 2</b>                         | <b>SD Diet Mean</b> | <b>PD Diet Mean</b> |
|---------------------------------------------|---------------------|---------------------|
| Membrane Transport                          | 0.1242783           | 0.12789727          |
| Carbohydrate Metabolism                     | 0.121309812         | 0.121732725         |
| Amino Acid Metabolism                       | 0.099278825         | 0.099563917         |
| Replication and Repair                      | 0.083813074         | 0.083452106         |
| Energy Metabolism                           | 0.059459054         | 0.05864909          |
| Translation                                 | 0.052489032         | 0.051638819         |
| Poorly Characterized                        | 0.04491741          | 0.044531658         |
| Metabolism of Cofactors and Vitamins        | 0.043188937         | 0.04248141          |
| Cellular Processes and Signaling            | 0.040690914         | 0.041076994         |
| Nucleotide Metabolism                       | 0.039395157         | 0.039605513         |
| Lipid Metabolism                            | 0.029995135         | 0.029376473         |
| Transcription                               | 0.028870699         | 0.02831977          |
| Metabolism                                  | 0.028431355         | 0.027739471         |
| Genetic Information Processing              | 0.023188168         | 0.024287642         |
| Xenobiotics Biodegradation and Metabolism   | 0.022772551         | 0.02256834          |
| Folding, Sorting and Degradation            | 0.022686923         | 0.022974972         |
| Glycan Biosynthesis and Metabolism          | 0.020887635         | 0.023043367         |
| Enzyme Families                             | 0.020168914         | 0.020094077         |
| Metabolism of Terpenoids and Polyketides    | 0.015579637         | 0.016283269         |
| Metabolism of Other Amino Acids             | 0.014995878         | 0.014709748         |
| Signal Transduction                         | 0.014909194         | 0.014280703         |
| Cell Motility                               | 0.014254934         | 0.011179372         |
| Biosynthesis of Other Secondary Metabolites | 0.010667105         | 0.009785173         |
| Cell Growth and Death                       | 0.005004842         | 0.004901653         |
| Infectious Diseases                         | 0.003194528         | 0.003360811         |
| Transport and Catabolism                    | 0.003137331         | 0.003210015         |
| Endocrine System                            | 0.002888757         | 0.003034939         |
| Signaling Molecules and Interaction         | 0.001764128         | 0.00202971          |
| Environmental Adaptation                    | 0.001618472         | 0.001541726         |
| Nervous System                              | 0.001117435         | 0.001139647         |
| Cancers                                     | 0.001028475         | 0.001100939         |
| Immune System                               | 0.000996724         | 0.000957413         |
| Metabolic Diseases                          | 0.000984337         | 0.00101531          |
| Neurodegenerative Diseases                  | 0.000961013         | 0.000898636         |
| Immune System Diseases                      | 0.000508963         | 0.000650139         |
| Excretory System                            | 0.00028169          | 0.000320532         |
| Digestive System                            | 0.000279197         | 0.000564316         |
| Circulatory System                          | 3.25E-06            | 1.13E-06            |
| Cardiovascular Diseases                     | 2.21E-06            | 1.20E-06            |





**Table S8. Imputed Glycoside Hydrolases compared across different diets. FDR < 0.05 highlighted green, GH abundances that are significantly increased in those communities on PD diet are highlighted orange.**

| GHS   | Probability | FDR corrected | SD Diet mean | PD Diet mean |
|-------|-------------|---------------|--------------|--------------|
| GH70  | 3.86E-09    | 4.25E-07      | 4.34E-05     | 0.000166394  |
| GH61  | 9.68E-09    | 5.32E-07      | 6.10E-06     | 1.87E-05     |
| GH68  | 2.65E-08    | 9.71E-07      | 3.24E-05     | 8.66E-05     |
| GH126 | 1.32E-07    | 3.63E-06      | 7.96E-05     | 0.000213617  |
| GH65  | 5.32E-07    | 1.17E-05      | 0.003074357  | 0.003849159  |
| GH119 | 1.26E-06    | 2.31E-05      | 2.28E-06     | 6.79E-06     |
| GH52  | 1.26E-06    | 1.98E-05      | 6.84E-06     | 2.04E-05     |
| GH81  | 1.26E-06    | 1.73E-05      | 9.12E-06     | 2.72E-05     |
| GH75  | 3.34E-06    | 4.08E-05      | 2.35E-05     | 0.000168224  |
| GH24  | 5.79E-06    | 6.37E-05      | 0.00648103   | 0.005071203  |
| GH57  | 6.97E-06    | 6.97E-05      | 0.006270352  | 0.004319449  |
| GH45  | 8.75E-06    | 8.02E-05      | 3.80E-06     | 8.01E-06     |
| GH128 | 8.75E-06    | 7.40E-05      | 3.80E-06     | 8.01E-06     |
| GH15  | 1.79E-05    | 0.000140529   | 0.003189267  | 0.002437687  |
| GH130 | 7.60E-05    | 0.000557461   | 0.015484423  | 0.01646965   |
| GH23  | 8.32E-05    | 0.000571975   | 0.029029056  | 0.024342383  |
| GH12  | 9.69E-05    | 0.000626804   | 5.86E-06     | 9.70E-06     |
| GH35  | 0.000148478 | 0.000907368   | 0.00900328   | 0.010845236  |
| GH38  | 0.000319979 | 0.001852511   | 0.005859508  | 0.006410674  |
| GH1   | 0.000491097 | 0.002701034   | 0.005900936  | 0.008792705  |
| GH37  | 0.00063278  | 0.003314564   | 9.88E-05     | 0.00020396   |
| GH129 | 0.000685447 | 0.003427236   | 0.000918884  | 0.001106938  |
| GH27  | 0.000722037 | 0.003453221   | 0.00783621   | 0.007471216  |
| GH18  | 0.000809088 | 0.00370832    | 0.014775368  | 0.016426728  |
| GH3   | 0.001067092 | 0.004695203   | 0.050897713  | 0.047754202  |
| GH89  | 0.001353949 | 0.005728247   | 0.00484954   | 0.006085551  |
| GH6   | 0.001563752 | 0.006370842   | 3.11E-05     | 2.21E-05     |
| GH10  | 0.002572504 | 0.010106264   | 0.003194689  | 0.002744838  |
| GH31  | 0.002911476 | 0.01104353    | 0.020374231  | 0.021977991  |
| GH115 | 0.003119667 | 0.011438777   | 0.005446182  | 0.006375392  |
| GH105 | 0.003203178 | 0.011366115   | 0.013393378  | 0.015677665  |
| GH43  | 0.003267118 | 0.011230719   | 0.069428753  | 0.076209979  |
| GH50  | 0.003626892 | 0.012089639   | 0.001561891  | 0.001931894  |
| GH66  | 0.004155904 | 0.013445571   | 0.001084269  | 0.00132377   |
| GH93  | 0.004350216 | 0.013672109   | 0.001042178  | 0.00128392   |
| GH22  | 0.004393135 | 0.013423469   | 0.000515825  | 0.000637101  |
| GH67  | 0.004531437 | 0.013471841   | 0.001604223  | 0.001950441  |
| GH88  | 0.004608598 | 0.013340678   | 0.008961107  | 0.01007045   |

|       |             |             |             |             |
|-------|-------------|-------------|-------------|-------------|
| GH17  | 0.004965056 | 0.014004005 | 9.90E-06    | 1.30E-05    |
| GH121 | 0.00507168  | 0.01394712  | 0.000517325 | 0.000636329 |
| GH46  | 0.00507168  | 0.013606947 | 0.000517325 | 0.000636329 |
| GH55  | 0.005081721 | 0.013309269 | 0.00051788  | 0.00063685  |
| GH114 | 0.00570396  | 0.014591525 | 0.002170806 | 0.001574016 |
| GH107 | 0.006994798 | 0.017486996 | 0.00051353  | 0.000628344 |
| GH91  | 0.007034278 | 0.017194903 | 0.001028594 | 0.00125791  |
| GH117 | 0.007095264 | 0.016966935 | 0.002061708 | 0.0025194   |
| GH85  | 0.008338161 | 0.019514845 | 0.00027707  | 0.000214964 |
| GH87  | 0.010482366 | 0.024022088 | 7.04E-05    | 9.35E-05    |
| GH28  | 0.014193902 | 0.031863862 | 0.021634645 | 0.024310143 |
| GH19  | 0.014620929 | 0.032166043 | 4.75E-05    | 3.81E-05    |
| GH108 | 0.016040138 | 0.034596377 | 5.24E-05    | 3.94E-05    |
| GH33  | 0.017781411 | 0.037614524 | 0.015059355 | 0.015942557 |
| GH123 | 0.023578513 | 0.048936537 | 0.005811688 | 0.005121626 |
| GH64  | 0.026239893 | 0.053451634 | 5.11E-06    | 4.13E-06    |
| GH109 | 0.027425301 | 0.054850602 | 0.05944138  | 0.054224782 |
| GH101 | 0.029550689 | 0.058045996 | 0.000183881 | 0.000266518 |
| GH74  | 0.030625145 | 0.059101156 | 0.007052303 | 0.005766464 |
| GH5   | 0.03895966  | 0.07388901  | 0.015226891 | 0.016501192 |
| GH76  | 0.041017989 | 0.076474217 | 0.016436192 | 0.017759745 |
| GH71  | 0.042896435 | 0.078643464 | 3.58E-06    | 2.91E-06    |
| GH95  | 0.045021859 | 0.081186958 | 0.016087949 | 0.016888462 |
| GH51  | 0.047533633 | 0.084333864 | 0.016226465 | 0.015615091 |
| GH80  | 0.049356759 | 0.086178467 | 3.60E-06    | 2.94E-06    |
| GH84  | 0.058016448 | 0.09971577  | 0.003589147 | 0.003684283 |
| GH99  | 0.072092292 | 0.12200234  | 0.006971145 | 0.00779533  |
| GH63  | 0.076890459 | 0.128150764 | 0.00370048  | 0.004022534 |
| GH104 | 0.077431081 | 0.127125655 | 0.000994614 | 0.000796285 |
| GH77  | 0.083498063 | 0.135070395 | 0.015714645 | 0.013777774 |
| GH32  | 0.101575519 | 0.161931986 | 0.013900722 | 0.015008614 |
| GH112 | 0.116109192 | 0.182457301 | 0.002043294 | 0.001694291 |
| GH13  | 0.119092675 | 0.184509779 | 0.074142367 | 0.066831381 |
| GH54  | 0.150157599 | 0.229407443 | 2.07E-06    | 1.71E-06    |
| GH79  | 0.150157599 | 0.226264875 | 4.14E-06    | 3.43E-06    |
| GH4   | 0.152107775 | 0.226106152 | 0.011457239 | 0.010893577 |
| GH127 | 0.173053911 | 0.253812402 | 0.01880408  | 0.018129316 |
| GH73  | 0.188328662 | 0.272580958 | 0.016366981 | 0.015505748 |
| GH116 | 0.253119602 | 0.361599431 | 0.002509893 | 0.002645595 |
| GH39  | 0.318856847 | 0.449669913 | 0.001587378 | 0.001364777 |
| GH92  | 0.366877748 | 0.510842434 | 0.052602211 | 0.050493713 |

|       |             |             |             |             |
|-------|-------------|-------------|-------------|-------------|
| GH62  | 0.383332028 | 0.527081539 | 0.000115861 | 9.69E-05    |
| GH9   | 0.386264553 | 0.524556801 | 0.004441201 | 0.003975864 |
| GH125 | 0.407866173 | 0.547137549 | 0.00686574  | 0.006637221 |
| GH25  | 0.420659572 | 0.557500638 | 0.011930978 | 0.012851487 |
| GH59  | 0.454201712 | 0.594787956 | 0.000262108 | 0.000290962 |
| GH124 | 0.477575915 | 0.61803942  | 0.000577514 | 0.00050804  |
| GH98  | 0.531532956 | 0.679867735 | 0.000182266 | 0.00020155  |
| GH36  | 0.53953822  | 0.682174761 | 0.017009062 | 0.017595748 |
| GH102 | 0.551259289 | 0.689074111 | 0.000367586 | 0.00034254  |
| GH103 | 0.567726264 | 0.701684146 | 0.000481637 | 0.000531191 |
| GH53  | 0.597770805 | 0.730608761 | 0.004168998 | 0.004372658 |
| GH30  | 0.637502114 | 0.770606951 | 0.010108498 | 0.009930241 |
| GH2   | 0.659017533 | 0.787955746 | 0.087124331 | 0.086506038 |
| GH94  | 0.660397322 | 0.781115113 | 0.005407808 | 0.005081827 |
| GH82  | 0.676690577 | 0.791871952 | 0.000179985 | 0.000192792 |
| GH97  | 0.697330912 | 0.807435793 | 0.021756947 | 0.02216002  |
| GH8   | 0.719571396 | 0.824508891 | 0.001197834 | 0.001140695 |
| GH78  | 0.739590113 | 0.838710438 | 0.027739431 | 0.027590628 |
| GH16  | 0.760444563 | 0.853560224 | 0.009878202 | 0.009755509 |
| GH106 | 0.77558737  | 0.861763744 | 0.008822731 | 0.008693305 |
| GH14  | 0.806282343 | 0.886910578 | 6.14E-05    | 5.86E-05    |
| GH42  | 0.810464502 | 0.882684111 | 0.00623121  | 0.006338398 |
| GH113 | 0.860080054 | 0.927537313 | 0.001567838 | 0.001606101 |
| GH26  | 0.915863921 | 0.9781071   | 0.006802706 | 0.006834917 |
| GH110 | 0.928500807 | 0.982068161 | 0.005355196 | 0.00533355  |
| GH29  | 0.929923155 | 0.97420521  | 0.023642805 | 0.023720986 |
| GH11  | 0.930242819 | 0.965346321 | 0.001672867 | 0.001661096 |
| GH20  | 0.971044208 | 0.998269746 | 0.038423243 | 0.038366944 |
| GH44  | 0.978087461 | 0.996200192 | 0.000236775 | 0.000237828 |
| GH48  | 0.978087461 | 0.987060741 | 0.000236775 | 0.000237828 |
| GH120 | 0.99712162  | 0.99712162  | 0.001279283 | 0.001279597 |

**Table S9. Imputed Glycoside Hydrolases compared across different diets in Fut2+ mice. FDR < 0.05 highlighted green, mucin glycan-degrading related GHs highlighted orange.**

| Glycoside Hydrolase | Probability | FDR Corrected | SD diet mean | PD diet mean |
|---------------------|-------------|---------------|--------------|--------------|
| GH70                | 9.76E-07    | 0.000107306   | 4.77E-05     | 0.000145118  |
| GH61                | 3.69E-06    | 0.000202802   | 6.62E-06     | 1.64E-05     |
| GH15                | 6.91E-06    | 0.000253474   | 0.003301082  | 0.002411039  |
| GH130               | 1.60E-05    | 0.00035252    | 0.015150275  | 0.016543869  |
| GH68                | 1.59E-05    | 0.00043675    | 3.43E-05     | 7.61E-05     |
| GH35                | 4.79E-05    | 0.000877805   | 0.00834214   | 0.010888576  |
| GH23                | 6.04E-05    | 0.000949712   | 0.03034079   | 0.024088108  |
| GH75                | 7.42E-05    | 0.001020358   | 1.89E-05     | 0.00016281   |
| GH81                | 0.00012185  | 0.001218501   | 1.00E-05     | 2.24E-05     |
| GH52                | 0.00012185  | 0.001340351   | 7.53E-06     | 1.68E-05     |
| GH119               | 0.00012185  | 0.001489279   | 2.51E-06     | 5.60E-06     |
| GH89                | 0.000252649 | 0.002137798   | 0.004349078  | 0.006145541  |
| GH65                | 0.000241203 | 0.002211024   | 0.003153163  | 0.003865055  |
| GH115               | 0.000373597 | 0.002739712   | 0.005124841  | 0.006411111  |
| GH38                | 0.00036008  | 0.0028292     | 0.005802169  | 0.00645118   |
| GH43                | 0.000428958 | 0.002949086   | 0.066702923  | 0.076540102  |
| GH126               | 0.000480087 | 0.003106445   | 9.91E-05     | 0.000196369  |
| GH27                | 0.000562672 | 0.003257574   | 0.007939384  | 0.007473503  |
| GH105               | 0.000537483 | 0.003284617   | 0.012442691  | 0.015750792  |
| GH121               | 0.000929231 | 0.003650552   | 0.000461185  | 0.000641314  |
| GH67                | 0.000853936 | 0.003757318   | 0.001452838  | 0.001963656  |
| GH46                | 0.000929231 | 0.003785757   | 0.000461185  | 0.000641314  |
| GH93                | 0.000835342 | 0.00382865    | 0.000929771  | 0.001292535  |
| GH66                | 0.001012332 | 0.00383988    | 0.000971619  | 0.001328709  |
| GH55                | 0.000920326 | 0.003893686   | 0.000461618  | 0.000641816  |
| GH117               | 0.001150536 | 0.003954969   | 0.001836299  | 0.00254403   |
| GH85                | 0.000827472 | 0.003957474   | 0.000308174  | 0.000204817  |
| GH91                | 0.001136289 | 0.004031993   | 0.000915791  | 0.001270289  |
| GH88                | 0.000811801 | 0.004059003   | 0.00848858   | 0.01013201   |
| GH107               | 0.001126026 | 0.004128762   | 0.000457097  | 0.000634566  |
| GH50                | 0.000762063 | 0.004191344   | 0.001394273  | 0.001943076  |
| GH22                | 0.000805869 | 0.004221218   | 0.000459609  | 0.000642203  |
| GH10                | 0.001502836 | 0.005009452   | 0.003498153  | 0.002711299  |
| GH45                | 0.001801744 | 0.005662623   | 4.09E-06     | 6.76E-06     |
| GH128               | 0.001801744 | 0.005829171   | 4.09E-06     | 6.76E-06     |
| GH18                | 0.002002083 | 0.006117474   | 0.014656723  | 0.016510054  |
| GH6                 | 0.002569922 | 0.00764031    | 3.17E-05     | 2.06E-05     |
| GH3                 | 0.002942702 | 0.008518348   | 0.052159536  | 0.047789403  |

|       |             |             |             |             |
|-------|-------------|-------------|-------------|-------------|
| GH28  | 0.003039154 | 0.008571973 | 0.02009679  | 0.024507281 |
| GH114 | 0.003239215 | 0.008907841 | 0.002476207 | 0.001539622 |
| GH37  | 0.003592252 | 0.00963775  | 9.34E-05    | 0.000199861 |
| GH95  | 0.005846077 | 0.015311153 | 0.015653293 | 0.016928944 |
| GH33  | 0.006016566 | 0.015391216 | 0.014529821 | 0.015949732 |
| GH19  | 0.007509884 | 0.018774709 | 4.91E-05    | 3.62E-05    |
| GH57  | 0.008877302 | 0.021700072 | 0.006074314 | 0.004347144 |
| GH24  | 0.00978291  | 0.023393916 | 0.006312376 | 0.005069234 |
| GH74  | 0.01165108  | 0.027268486 | 0.008093605 | 0.005563735 |
| GH76  | 0.013237452 | 0.030335828 | 0.015357068 | 0.017889408 |
| GH99  | 0.01461156  | 0.032801461 | 0.006307646 | 0.007852947 |
| GH12  | 0.022817509 | 0.048267808 | 6.10E-06    | 8.40E-06    |
| GH129 | 0.023350691 | 0.048463697 | 0.000955275 | 0.001126951 |
| GH63  | 0.024048634 | 0.048987959 | 0.003392272 | 0.004065447 |
| GH4   | 0.022787849 | 0.049150263 | 0.011890587 | 0.010927319 |
| GH73  | 0.0227214   | 0.049987079 | 0.017031662 | 0.015306078 |
| GH64  | 0.02563707  | 0.051274141 | 5.18E-06    | 3.96E-06    |
| GH77  | 0.031350522 | 0.061581383 | 0.017433674 | 0.013560886 |
| GH13  | 0.034113091 | 0.065832281 | 0.081872403 | 0.065854419 |
| GH51  | 0.040152658 | 0.076151593 | 0.016545848 | 0.015589951 |
| GH71  | 0.055350117 | 0.103195134 | 3.59E-06    | 2.80E-06    |
| GH80  | 0.057335657 | 0.105115372 | 3.61E-06    | 2.81E-06    |
| GH103 | 0.058986175 | 0.106368513 | 0.000348159 | 0.000497387 |
| GH112 | 0.066233532 | 0.11564585  | 0.002383416 | 0.001651961 |
| GH9   | 0.065633289 | 0.116446159 | 0.005558923 | 0.003859172 |
| GH62  | 0.083231843 | 0.140853889 | 0.000150555 | 9.19E-05    |
| GH116 | 0.082064053 | 0.141047591 | 0.002312412 | 0.002669697 |
| GH108 | 0.085523517 | 0.142539195 | 5.11E-05    | 3.96E-05    |
| GH124 | 0.089613364 | 0.147126418 | 0.000770902 | 0.00048995  |
| GH109 | 0.115883786 | 0.187459066 | 0.059001434 | 0.054150899 |
| GH39  | 0.118675333 | 0.18919256  | 0.00192534  | 0.001330915 |
| GH14  | 0.148315365 | 0.233067002 | 7.90E-05    | 5.44E-05    |
| GH97  | 0.157794595 | 0.2444705   | 0.02007869  | 0.022485967 |
| GH8   | 0.164198177 | 0.250858326 | 0.001489908 | 0.001096228 |
| GH48  | 0.187128626 | 0.278164173 | 0.000326763 | 0.000230959 |
| GH44  | 0.187128626 | 0.281974641 | 0.000326763 | 0.000230959 |
| GH94  | 0.197899586 | 0.290252726 | 0.006592783 | 0.004946336 |
| GH1   | 0.209455326 | 0.303159025 | 0.006978173 | 0.008514196 |
| GH104 | 0.220788065 | 0.311367784 | 0.000967459 | 0.000797671 |
| GH87  | 0.21797101  | 0.311387158 | 7.10E-05    | 8.19E-05    |
| GH54  | 0.228374041 | 0.314014307 | 2.01E-06    | 1.65E-06    |

|       |             |             |             |             |
|-------|-------------|-------------|-------------|-------------|
| GH79  | 0.228374041 | 0.317989172 | 4.03E-06    | 3.30E-06    |
| GH29  | 0.240762714 | 0.326961711 | 0.022259068 | 0.023898827 |
| GH11  | 0.258954546 | 0.347378049 | 0.001910305 | 0.001636856 |
| GH82  | 0.278049179 | 0.368498912 | 0.00025274  | 0.000187794 |
| GH26  | 0.296180457 | 0.387855361 | 0.007335961 | 0.006782533 |
| GH20  | 0.300873351 | 0.389365513 | 0.035978343 | 0.038784531 |
| GH110 | 0.321219378 | 0.397012715 | 0.004996283 | 0.005411129 |
| GH98  | 0.318314432 | 0.39789304  | 0.000255252 | 0.000195431 |
| GH31  | 0.311472477 | 0.398395028 | 0.020958638 | 0.021923237 |
| GH59  | 0.315407084 | 0.398790566 | 0.000348321 | 0.000275659 |
| GH17  | 0.327637029 | 0.400445257 | 1.04E-05    | 1.16E-05    |
| GH2   | 0.36566997  | 0.442018645 | 0.084937304 | 0.086937382 |
| GH84  | 0.371202535 | 0.443829117 | 0.003621304 | 0.003679407 |
| GH106 | 0.385939428 | 0.456487495 | 0.008137487 | 0.008756009 |
| GH113 | 0.40674661  | 0.470969759 | 0.001891995 | 0.001587791 |
| GH78  | 0.41135444  | 0.471343629 | 0.027079539 | 0.027682319 |
| GH123 | 0.404732341 | 0.473622952 | 0.005610902 | 0.005233045 |
| GH120 | 0.443013797 | 0.50238678  | 0.001390841 | 0.001272455 |
| GH42  | 0.459621391 | 0.515901561 | 0.006850836 | 0.006269676 |
| GH16  | 0.467720745 | 0.519689717 | 0.009295831 | 0.009799699 |
| GH30  | 0.502679007 | 0.552946908 | 0.009551626 | 0.009993698 |
| GH25  | 0.508999773 | 0.554356189 | 0.013802413 | 0.012496974 |
| GH53  | 0.566812063 | 0.611267911 | 0.004677558 | 0.004303171 |
| GH36  | 0.61570424  | 0.657548217 | 0.01825721  | 0.01745752  |
| GH92  | 0.641525109 | 0.678536173 | 0.049048534 | 0.05098848  |
| GH125 | 0.668922142 | 0.700775577 | 0.006454063 | 0.006666643 |
| GH102 | 0.692428582 | 0.718557963 | 0.000312796 | 0.000332399 |
| GH101 | 0.765495372 | 0.786957859 | 0.000236667 | 0.000252563 |
| GH32  | 0.847111528 | 0.862798778 | 0.014656949 | 0.01487443  |
| GH127 | 0.878644182 | 0.886705138 | 0.018096995 | 0.018225737 |
| GH5   | 0.975133646 | 0.975133646 | 0.016353537 | 0.016389033 |

**Table S10. Imputed Glycoside Hydrolases compared across different diets in Fut2- mice. FDR < 0.05 highlighted green, mucin glycan-degrading related GHs highlighted orange.**

| Glycoside Hydrolase | Probability | FDR Corrected | SD diet mean | PD diet mean |
|---------------------|-------------|---------------|--------------|--------------|
| GH75                | 5.74E-06    | 0.000157719   | 2.98E-05     | 0.000177968  |
| GH70                | 5.57E-06    | 0.000204058   | 4.74E-05     | 0.000204692  |
| GH61                | 5.23E-06    | 0.000287905   | 6.32E-06     | 2.29E-05     |
| GH126               | 1.37E-05    | 0.000301581   | 6.61E-05     | 0.000244662  |
| GH68                | 3.53E-06    | 0.000388132   | 3.25E-05     | 0.000105597  |
| GH128               | 0.000132959 | 0.001329587   | 3.83E-06     | 1.03E-05     |
| GH12                | 7.58E-05    | 0.001390366   | 5.53E-06     | 1.20E-05     |
| GH45                | 0.000132959 | 0.001462546   | 3.83E-06     | 1.03E-05     |
| GH81                | 0.000129321 | 0.00158059    | 9.97E-06     | 3.58E-05     |
| GH119               | 0.000129321 | 0.001778164   | 2.49E-06     | 8.94E-06     |
| GH52                | 0.000129321 | 0.002032187   | 7.48E-06     | 2.68E-05     |
| GH37                | 0.00044348  | 0.004065236   | 9.59E-05     | 0.000211339  |
| GH17                | 0.000523977 | 0.004433647   | 9.16E-06     | 1.56E-05     |
| GH65                | 0.002346629 | 0.018437801   | 0.003106584  | 0.003820546  |
| GH87                | 0.002971422 | 0.021790425   | 6.80E-05     | 0.000114243  |
| GH101               | 0.007826502 | 0.0538072     | 0.000137195  | 0.000291636  |
| GH1                 | 0.00832438  | 0.053863634   | 0.00555209   | 0.009294022  |
| GH129               | 0.015179214 | 0.092761866   | 0.000911157  | 0.001070915  |
| GH24                | 0.024233077 | 0.140296759   | 0.006257187  | 0.005074748  |
| GH57                | 0.025520568 | 0.140363123   | 0.005983108  | 0.004269598  |
| GH59                | 0.031808232 | 0.16661455    | 0.000203126  | 0.000318506  |
| GH98                | 0.033436762 | 0.16718381    | 0.000135618  | 0.000212563  |
| GH5                 | 0.035096601 | 0.167853308   | 0.014621261  | 0.016703077  |
| GH82                | 0.050722946 | 0.232480171   | 0.000133125  | 0.00020179   |
| GH15                | 0.070494342 | 0.310175105   | 0.003027042  | 0.002485654  |
| GH31                | 0.10003289  | 0.407541405   | 0.020454233  | 0.022076547  |
| GH38                | 0.105749897 | 0.415446022   | 0.005934892  | 0.006337765  |
| GH3                 | 0.098653811 | 0.417381506   | 0.050405703  | 0.047690841  |
| GH44                | 0.120095191 | 0.426144226   | 0.000174219  | 0.000250192  |
| GH48                | 0.120095191 | 0.440349034   | 0.000174219  | 0.000250192  |
| GH27                | 0.11624533  | 0.440930563   | 0.007725352  | 0.007467099  |
| GH18                | 0.132588382 | 0.455772562   | 0.015104325  | 0.016276741  |
| GH84                | 0.152715103 | 0.466629482   | 0.003588538  | 0.003693061  |
| GH123               | 0.145664888 | 0.471268754   | 0.005777051  | 0.004921073  |
| GH35                | 0.150844365 | 0.47408229    | 0.009586748  | 0.010767224  |
| GH23                | 0.145068772 | 0.483562573   | 0.027723873  | 0.024800077  |
| GH25                | 0.187042867 | 0.541439877   | 0.011001167  | 0.013489609  |
| GH78                | 0.182995765 | 0.544041464   | 0.028286593  | 0.027425584  |



|       |             |             |             |             |
|-------|-------------|-------------|-------------|-------------|
| GH127 | 0.196327497 | 0.553744222 | 0.019039661 | 0.017955758 |
| GH108 | 0.242832653 | 0.65150224  | 4.67E-05    | 3.89E-05    |
| GH130 | 0.254965658 | 0.652237729 | 0.015892492 | 0.016336056 |
| GH14  | 0.239438479 | 0.658455817 | 4.61E-05    | 6.63E-05    |
| GH32  | 0.253832973 | 0.664800642 | 0.013886346 | 0.015250146 |
| GH43  | 0.393294873 | 0.665575939 | 0.072132463 | 0.075615757 |
| GH46  | 0.3812773   | 0.66572227  | 0.000563136 | 0.000627355 |
| GH124 | 0.390981779 | 0.671999932 | 0.00042078  | 0.000540602 |
| GH89  | 0.269013544 | 0.672533859 | 0.005254418 | 0.00597757  |
| GH26  | 0.405068414 | 0.675114023 | 0.006520293 | 0.006929209 |
| GH121 | 0.3812773   | 0.676459726 | 0.000563136 | 0.000627355 |
| GH55  | 0.380510519 | 0.686166509 | 0.00056355  | 0.000627911 |
| GH92  | 0.28081061  | 0.686425935 | 0.053866479 | 0.049603133 |
| GH105 | 0.306206885 | 0.687403211 | 0.014139637 | 0.015546037 |
| GH125 | 0.438011016 | 0.688303025 | 0.006955556 | 0.006584262 |
| GH107 | 0.434011745 | 0.691902781 | 0.000559329 | 0.000617144 |
| GH104 | 0.377675554 | 0.692405182 | 0.000973744 | 0.000793789 |
| GH2   | 0.290216194 | 0.693995247 | 0.088241907 | 0.08572962  |
| GH33  | 0.360239387 | 0.695198817 | 0.015338155 | 0.015929642 |
| GH9   | 0.467993736 | 0.695666364 | 0.003629706 | 0.004185911 |
| GH93  | 0.354739248 | 0.696809237 | 0.001133047 | 0.001268415 |
| GH109 | 0.374817017 | 0.698811388 | 0.058261303 | 0.05435777  |
| GH10  | 0.476854783 | 0.699387015 | 0.002945804 | 0.002805208 |
| GH114 | 0.349898717 | 0.699797434 | 0.001962448 | 0.001635926 |
| GH22  | 0.369072228 | 0.699964571 | 0.000561849 | 0.000627917 |
| GH51  | 0.30593334  | 0.701097237 | 0.016183303 | 0.015660341 |
| GH91  | 0.433743089 | 0.701643233 | 0.001119991 | 0.001235626 |
| GH53  | 0.466415246 | 0.702817495 | 0.00402353  | 0.004497736 |
| GH62  | 0.508486709 | 0.708019468 | 8.47E-05    | 0.000105744 |
| GH115 | 0.348149152 | 0.709192716 | 0.005786285 | 0.006311097 |
| GH97  | 0.535226337 | 0.709336109 | 0.022645848 | 0.021573315 |
| GH106 | 0.523074021 | 0.710347436 | 0.009088521 | 0.008580438 |
| GH117 | 0.433669264 | 0.711994314 | 0.002243925 | 0.002475065 |
| GH110 | 0.466370017 | 0.712509748 | 0.005497614 | 0.005193909 |
| GH11  | 0.531192176 | 0.71257487  | 0.001562609 | 0.001704729 |
| GH28  | 0.51855143  | 0.713008216 | 0.022749236 | 0.023955293 |
| GH8   | 0.506167297 | 0.713825675 | 0.001046081 | 0.001220736 |
| GH6   | 0.305247572 | 0.71440921  | 2.85E-05    | 2.48E-05    |
| GH50  | 0.331628749 | 0.715277694 | 0.001699608 | 0.001911766 |
| GH66  | 0.326119857 | 0.717463686 | 0.00117436  | 0.00131488  |
| GH30  | 0.463219751 | 0.717664402 | 0.010287291 | 0.009816017 |

|       |             |             |             |             |
|-------|-------------|-------------|-------------|-------------|
| GH20  | 0.50303339  | 0.718619129 | 0.039391929 | 0.037615286 |
| GH88  | 0.347767317 | 0.721781224 | 0.009318412 | 0.009959643 |
| GH36  | 0.501923494 | 0.726468216 | 0.016749424 | 0.017844558 |
| GH67  | 0.344764617 | 0.729309767 | 0.00172656  | 0.001926655 |
| GH29  | 0.571090679 | 0.747856842 | 0.024272159 | 0.023400872 |
| GH113 | 0.622206293 | 0.786697612 | 0.001453481 | 0.001639059 |
| GH16  | 0.619683636 | 0.792618604 | 0.010022405 | 0.009675966 |
| GH112 | 0.645460083 | 0.797759653 | 0.001946763 | 0.001770485 |
| GH102 | 0.617302464 | 0.798862012 | 0.000397622 | 0.000360793 |
| GH42  | 0.640424449 | 0.800530561 | 0.006100568 | 0.006462098 |
| GH95  | 0.675389339 | 0.825475858 | 0.016513718 | 0.016815593 |
| GH99  | 0.72020978  | 0.851861031 | 0.007403918 | 0.00769162  |
| GH76  | 0.705526923 | 0.852834743 | 0.017122016 | 0.017526352 |
| GH94  | 0.714388178 | 0.854159778 | 0.004872742 | 0.005325711 |
| GH77  | 0.75600399  | 0.88468552  | 0.014743235 | 0.014168174 |
| GH54  | 0.789276644 | 0.904379487 | 1.73E-06    | 1.83E-06    |
| GH4   | 0.798782355 | 0.90583566  | 0.011026181 | 0.010832839 |
| GH74  | 0.807433505 | 0.906302914 | 0.00635203  | 0.006131377 |
| GH79  | 0.789276644 | 0.913899272 | 3.45E-06    | 3.65E-06    |
| GH80  | 0.830209339 | 0.922454821 | 3.06E-06    | 3.16E-06    |
| GH64  | 0.921780156 | 0.930236854 | 4.37E-06    | 4.44E-06    |
| GH39  | 0.918283593 | 0.935288845 | 0.001465497 | 0.001425728 |
| GH85  | 0.916648103 | 0.942348517 | 0.000236803 | 0.000233229 |
| GH71  | 0.909167325 | 0.943475526 | 3.04E-06    | 3.10E-06    |
| GH13  | 0.894128389 | 0.945712719 | 0.069624603 | 0.068589914 |
| GH73  | 0.904761314 | 0.947845186 | 0.015720134 | 0.015865153 |
| GH63  | 0.890832599 | 0.951374621 | 0.003905313 | 0.003945292 |
| GH120 | 0.86920035  | 0.956120385 | 0.001267169 | 0.001292453 |
| GH116 | 0.889802701 | 0.959591148 | 0.002628411 | 0.002602212 |
| GH103 | 0.887232155 | 0.966292446 | 0.000570045 | 0.000592038 |
| GH19  | 0.972990545 | 0.972990545 | 4.12E-05    | 4.14E-05    |

**Table S11. Imputed Glycoside Hydrolases compared across genotypes in mice on SD diet. FDR < 0.05 highlighted green, mucin glycan-degrading related GHs highlighted orange.**

| Glycoside Hydrolase | Probability | FDR Corrected | Fut2+ mean  | Fut2- mean  |
|---------------------|-------------|---------------|-------------|-------------|
| GH44                | 0.001825461 | 0.022311186   | 0.00029331  | 0.000135013 |
| GH59                | 0.002763145 | 0.023380454   | 0.000316085 | 0.000164951 |
| GH101               | 0.002368595 | 0.023685953   | 0.000231331 | 9.85E-05    |
| GH28                | 0.007355226 | 0.023796321   | 0.020380482 | 0.023892139 |
| GH62                | 0.002606739 | 0.023895111   | 0.000147037 | 5.97E-05    |
| GH74                | 0.007316021 | 0.024386737   | 0.0077776   | 0.005746769 |
| GH76                | 0.00729255  | 0.025068141   | 0.01564758  | 0.017855694 |
| GH48                | 0.001825461 | 0.025100084   | 0.00029331  | 0.000135013 |
| GH14                | 0.002303117 | 0.025334284   | 7.72E-05    | 3.29E-05    |
| GH63                | 0.00715597  | 0.025392152   | 0.003478726 | 0.004099637 |
| GH99                | 0.007035394 | 0.025796446   | 0.006441777 | 0.007924007 |
| GH93                | 0.006482868 | 0.026411685   | 0.000945555 | 0.001216099 |
| GH73                | 0.007022767 | 0.026638081   | 0.017080007 | 0.015083535 |
| GH50                | 0.006370049 | 0.026950206   | 0.001416912 | 0.001822852 |
| GH9                 | 0.001722835 | 0.027073114   | 0.005217454 | 0.003043946 |
| GH89                | 0.006898432 | 0.027100982   | 0.004425106 | 0.005613521 |
| GH33                | 0.00929724  | 0.027640442   | 0.014672754 | 0.015755237 |
| GH105               | 0.009134228 | 0.02791014    | 0.012563257 | 0.014887595 |
| GH55                | 0.006346478 | 0.027924501   | 0.000469342 | 0.000605248 |
| GH67                | 0.010530625 | 0.028252897   | 0.001473669 | 0.001839221 |
| GH95                | 0.009039253 | 0.028409081   | 0.015654946 | 0.016867354 |
| GH88                | 0.010431756 | 0.028687329   | 0.008557839 | 0.009686991 |
| GH13                | 0.009960952 | 0.028834336   | 0.079623688 | 0.06427599  |
| GH117               | 0.006305802 | 0.028901592   | 0.001866999 | 0.002412182 |
| GH23                | 0.011037473 | 0.028907668   | 0.030284908 | 0.026768522 |
| GH35                | 0.003687762 | 0.028975272   | 0.008424463 | 0.010045152 |
| GH78                | 0.010426983 | 0.029409439   | 0.0272799   | 0.028566586 |
| GH130               | 0.001640964 | 0.030084342   | 0.015156539 | 0.016074613 |
| GH121               | 0.006302087 | 0.030140417   | 0.000468768 | 0.000604728 |
| GH26                | 0.013173932 | 0.03019026    | 0.007154594 | 0.006169308 |
| GH1                 | 0.01308762  | 0.0306306     | 0.006665285 | 0.004525108 |
| GH115               | 0.012563287 | 0.030710257   | 0.005121989 | 0.006029729 |
| GH2                 | 0.012032874 | 0.030781769   | 0.085539908 | 0.089976293 |
| GH77                | 0.012907158 | 0.030864943   | 0.016954957 | 0.013482084 |
| GH19                | 0.013811561 | 0.031005544   | 5.15E-05    | 4.04E-05    |
| GH29                | 0.014977039 | 0.03108442    | 0.02268453  | 0.025367702 |
| GH116               | 0.014741103 | 0.031183103   | 0.002376967 | 0.002749159 |
| GH103               | 0.014499858 | 0.031274203   | 0.00038806  | 0.000650076 |

|       |             |             |             |             |
|-------|-------------|-------------|-------------|-------------|
| GH8   | 0.012552344 | 0.03138086  | 0.001386974 | 0.000857381 |
| GH46  | 0.006302087 | 0.031510436 | 0.000468768 | 0.000604728 |
| GH4   | 0.001435568 | 0.031582491 | 0.011947805 | 0.01057422  |
| GH114 | 0.01442697  | 0.031739335 | 0.002397872 | 0.001762087 |
| GH91  | 0.006250475 | 0.032740583 | 0.000931049 | 0.001204176 |
| GH97  | 0.016491451 | 0.033593697 | 0.020624319 | 0.023795676 |
| GH107 | 0.006208728 | 0.034148004 | 0.00046469  | 0.000601441 |
| GH5   | 0.017234512 | 0.034469025 | 0.01592437  | 0.013971427 |
| GH82  | 0.005072379 | 0.034872609 | 0.000221007 | 0.000106146 |
| GH22  | 0.00620003  | 0.035894908 | 0.000467122 | 0.000603492 |
| GH17  | 0.018409343 | 0.036161209 | 1.07E-05    | 8.48E-06    |
| GH98  | 0.005016219 | 0.036785609 | 0.000223439 | 0.000108156 |
| GH66  | 0.006156939 | 0.037625736 | 0.000988342 | 0.001256937 |
| GH43  | 0.005829819 | 0.03772236  | 0.066773098 | 0.074208931 |
| GH106 | 0.019805985 | 0.038222075 | 0.008351396 | 0.009671133 |
| GH126 | 0.001402201 | 0.038560529 | 9.66E-05    | 4.91E-05    |
| GH25  | 0.022731966 | 0.043112349 | 0.013132876 | 0.009767562 |
| GH64  | 0.023262641 | 0.043371026 | 5.52E-06    | 4.37E-06    |
| GH124 | 0.001223119 | 0.044847686 | 0.000727125 | 0.000308213 |
| GH85  | 0.000421381 | 0.046351939 | 0.000311054 | 0.0002159   |
| GH11  | 0.025718583 | 0.047150736 | 0.001819753 | 0.001408472 |
| GH10  | 0.000892373 | 0.049080499 | 0.003411708 | 0.002804055 |
| GH112 | 0.028945109 | 0.052196097 | 0.002269774 | 0.00163563  |
| GH94  | 0.032430405 | 0.057537816 | 0.006159717 | 0.004054371 |
| GH12  | 0.035714514 | 0.062358674 | 6.30E-06    | 5.08E-06    |
| GH15  | 0.040075632 | 0.068879992 | 0.003325714 | 0.002943662 |
| GH71  | 0.041749821 | 0.070653543 | 3.87E-06    | 3.07E-06    |
| GH45  | 0.04333715  | 0.071150545 | 4.08E-06    | 3.30E-06    |
| GH80  | 0.044569067 | 0.07209702  | 3.89E-06    | 3.09E-06    |
| GH128 | 0.04333715  | 0.072228584 | 4.08E-06    | 3.30E-06    |
| GH20  | 0.046063013 | 0.073433788 | 0.036956979 | 0.041062517 |
| GH127 | 0.048357104 | 0.075989735 | 0.018346203 | 0.019628257 |
| GH113 | 0.050759357 | 0.078641257 | 0.001771441 | 0.001201352 |
| GH39  | 0.052084825 | 0.079574039 | 0.001796276 | 0.001211363 |
| GH3   | 0.057666335 | 0.086894477 | 0.051700982 | 0.049451828 |
| GH30  | 0.062180976 | 0.091198764 | 0.009770775 | 0.010716399 |
| GH61  | 0.062173768 | 0.092420467 | 6.53E-06    | 5.31E-06    |
| GH92  | 0.065204437 | 0.094374842 | 0.05053606  | 0.056321283 |
| GH27  | 0.0690073   | 0.097317986 | 0.007883458 | 0.007751162 |
| GH16  | 0.068755033 | 0.098221476 | 0.009527749 | 0.010509017 |
| GH68  | 0.070728431 | 0.098482625 | 3.46E-05    | 2.85E-05    |

|       |             |             |             |             |
|-------|-------------|-------------|-------------|-------------|
| GH110 | 0.07197884  | 0.098970904 | 0.005150528 | 0.005723597 |
| GH6   | 0.074734609 | 0.101491444 | 3.33E-05    | 2.73E-05    |
| GH102 | 0.093133503 | 0.123429943 | 0.000337048 | 0.000422556 |
| GH125 | 0.092287594 | 0.123800431 | 0.00663865  | 0.007274502 |
| GH36  | 0.113895259 | 0.147393865 | 0.017719597 | 0.015730099 |
| GH53  | 0.113108622 | 0.148118433 | 0.004456743 | 0.003651059 |
| GH52  | 0.125625044 | 0.155266909 | 7.29E-06    | 6.03E-06    |
| GH70  | 0.1276124   | 0.155970712 | 4.62E-05    | 3.82E-05    |
| GH119 | 0.125625044 | 0.157031305 | 2.43E-06    | 2.01E-06    |
| GH81  | 0.125625044 | 0.158836263 | 9.73E-06    | 8.04E-06    |
| GH84  | 0.12443402  | 0.159159793 | 0.003614979 | 0.003542649 |
| GH42  | 0.14110644  | 0.170568224 | 0.006554033 | 0.005650129 |
| GH54  | 0.156789113 | 0.185449488 | 2.22E-06    | 1.80E-06    |
| GH129 | 0.159879538 | 0.187093076 | 0.000936122 | 0.000887854 |
| GH79  | 0.156789113 | 0.187465243 | 4.44E-06    | 3.59E-06    |
| GH87  | 0.172839912 | 0.200130425 | 7.31E-05    | 6.54E-05    |
| GH51  | 0.239652585 | 0.27460192  | 0.016387868 | 0.015935939 |
| GH120 | 0.245159148 | 0.278015529 | 0.001329911 | 0.001188154 |
| GH108 | 0.251932262 | 0.28278111  | 5.51E-05    | 4.76E-05    |
| GH32  | 0.275789529 | 0.30643281  | 0.014253058 | 0.013266518 |
| GH65  | 0.29075515  | 0.319830664 | 0.003119714 | 0.002992713 |
| GH75  | 0.314479407 | 0.342502325 | 2.04E-05    | 2.91E-05    |
| GH18  | 0.388091213 | 0.41852974  | 0.014595257 | 0.015099568 |
| GH109 | 0.477480982 | 0.509931146 | 0.060161386 | 0.058145371 |
| GH31  | 0.575584506 | 0.608791304 | 0.02051965  | 0.020112478 |
| GH104 | 0.720343242 | 0.754645301 | 0.001010175 | 0.000966604 |
| GH57  | 0.801797968 | 0.824278285 | 0.006319628 | 0.006181654 |
| GH38  | 0.794560072 | 0.824543471 | 0.005851495 | 0.005873931 |
| GH37  | 0.862749265 | 0.878726103 | 9.94E-05    | 9.76E-05    |
| GH24  | 0.924907568 | 0.924907568 | 0.006494217 | 0.006457293 |
| GH123 | 0.917988371 | 0.926410282 | 0.005797871 | 0.00583656  |

**Table S12. Imputed Glycoside Hydrolases compared across genotypes in mice on PD diet. FDR < 0.05 highlighted green, mucin glycan-degrading related GHs highlighted orange.**

| <b>Glycoside Hydrolase</b> | <b>Probability</b> | <b>FDR Corrected</b> | <b>Fut2+ mean</b> | <b>Fut2- mean</b> |
|----------------------------|--------------------|----------------------|-------------------|-------------------|
| GH84                       | 0.907088351        | 0.968735132          | 0.003679407       | 0.003693061       |
| GH37                       | 0.895366682        | 0.975151832          | 0.000199861       | 0.000211339       |
| GH66                       | 0.904937526        | 0.975913019          | 0.001328709       | 0.00131488        |
| GH3                        | 0.93204341         | 0.97642643           | 0.047789403       | 0.047690841       |
| GH95                       | 0.861138911        | 0.97654928           | 0.016928944       | 0.016815593       |
| GH4                        | 0.894270255        | 0.98369728           | 0.010927319       | 0.010832839       |
| GH108                      | 0.931365859        | 0.985098505          | 3.96E-05          | 3.89E-05          |
| GH50                       | 0.859727334        | 0.985104237          | 0.001943076       | 0.001911766       |
| GH104                      | 0.986796363        | 0.986796363          | 0.000797671       | 0.000793789       |
| GH65                       | 0.890633338        | 0.989592598          | 0.003865055       | 0.003820546       |
| GH27                       | 0.981362094        | 0.990365416          | 0.007473503       | 0.007467099       |
| GH51                       | 0.883206006        | 0.99135368           | 0.015589951       | 0.015660341       |
| GH93                       | 0.838659685        | 0.991963069          | 0.001292535       | 0.001268415       |
| GH105                      | 0.859401351        | 0.995096302          | 0.015750792       | 0.015546037       |
| GH109                      | 0.959196078        | 0.995392156          | 0.054150899       | 0.05435777        |
| GH24                       | 0.981206418        | 0.999376907          | 0.005069234       | 0.005074748       |
| GH75                       | 0.855338046        | 1.0009275            | 0.00016281        | 0.000177968       |
| GH113                      | 0.837914538        | 1.001854339          | 0.001587791       | 0.001639059       |
| GH33                       | 0.975080411        | 1.002419114          | 0.015949732       | 0.015929642       |
| GH67                       | 0.833445098        | 1.007461107          | 0.001963656       | 0.001926655       |
| GH35                       | 0.831564485        | 1.016356593          | 0.010888576       | 0.010767224       |
| GH115                      | 0.830730563        | 1.02674564           | 0.006411111       | 0.006311097       |
| GH120                      | 0.82140317         | 1.026753962          | 0.001272455       | 0.001292453       |
| GH55                       | 0.815731291        | 1.031384391          | 0.000641816       | 0.000627911       |
| GH121                      | 0.815268482        | 1.042785268          | 0.000641314       | 0.000627355       |
| GH46                       | 0.815268482        | 1.05505333           | 0.000641314       | 0.000627355       |
| GH99                       | 0.813237932        | 1.064954435          | 0.007852947       | 0.00769162        |
| GH22                       | 0.81092951         | 1.074725857          | 0.000642203       | 0.000627917       |
| GH57                       | 0.804645107        | 1.079401972          | 0.004347144       | 0.004269598       |
| GH16                       | 0.799459607        | 1.085685887          | 0.009799699       | 0.009675966       |
| GH88                       | 0.785111623        | 1.093193399          | 0.01013201        | 0.009959643       |
| GH106                      | 0.798229036        | 1.097564925          | 0.008756009       | 0.008580438       |
| GH15                       | 0.783165231        | 1.104463787          | 0.002411039       | 0.002485654       |
| GH38                       | 0.77950929         | 1.1135847            | 0.00645118        | 0.006337765       |
| GH125                      | 0.777155689        | 1.124830602          | 0.006666643       | 0.006584262       |
| GH117                      | 0.775559552        | 1.137487342          | 0.00254403        | 0.002475065       |
| GH91                       | 0.774477923        | 1.151250966          | 0.001270289       | 0.001235626       |
| GH107                      | 0.773403793        | 1.165402976          | 0.000634566       | 0.000617144       |

|       |             |             |             |             |
|-------|-------------|-------------|-------------|-------------|
| GH43  | 0.770747292 | 1.177530585 | 0.076540102 | 0.075615757 |
| GH36  | 0.766200711 | 1.187071525 | 0.01745752  | 0.017844558 |
| GH89  | 0.763317094 | 1.199498291 | 0.006145541 | 0.00597757  |
| GH29  | 0.712228247 | 1.20530934  | 0.023898827 | 0.023400872 |
| GH78  | 0.762639886 | 1.215802717 | 0.027682319 | 0.027425584 |
| GH18  | 0.75463218  | 1.220728527 | 0.016510054 | 0.016276741 |
| GH31  | 0.744320113 | 1.222018096 | 0.021923237 | 0.022076547 |
| GH28  | 0.712153035 | 1.224013029 | 0.024507281 | 0.023955293 |
| GH114 | 0.740822761 | 1.234704601 | 0.001539622 | 0.001635926 |
| GH102 | 0.697900225 | 1.238210076 | 0.000332399 | 0.000360793 |
| GH53  | 0.710358203 | 1.240307974 | 0.004303171 | 0.004497736 |
| GH129 | 0.697372789 | 1.257557489 | 0.001126951 | 0.001070915 |
| GH42  | 0.696601278 | 1.277102344 | 0.006269676 | 0.006462098 |
| GH39  | 0.693717257 | 1.293371157 | 0.001330915 | 0.001425728 |
| GH30  | 0.692463882 | 1.313293569 | 0.009993698 | 0.009816017 |
| GH26  | 0.692216378 | 1.335856167 | 0.006782533 | 0.006929209 |
| GH77  | 0.686127299 | 1.347750053 | 0.013560886 | 0.014168174 |
| GH79  | 0.677274921 | 1.354549843 | 3.30E-06    | 3.65E-06    |
| GH54  | 0.677274921 | 1.379634099 | 1.65E-06    | 1.83E-06    |
| GH94  | 0.666526876 | 1.383357668 | 0.004946336 | 0.005325711 |
| GH127 | 0.656468315 | 1.388682975 | 0.018225737 | 0.017955758 |
| GH116 | 0.650915646 | 1.403935706 | 0.002669697 | 0.002602212 |
| GH32  | 0.650367396 | 1.430808271 | 0.01487443  | 0.015250146 |
| GH112 | 0.64489805  | 1.447730315 | 0.001651961 | 0.001770485 |
| GH13  | 0.637475741 | 1.460881905 | 0.065854419 | 0.068589914 |
| GH76  | 0.612075429 | 1.463658635 | 0.017889408 | 0.017526352 |
| GH73  | 0.632903464 | 1.481263427 | 0.015306078 | 0.015865153 |
| GH23  | 0.607676057 | 1.485430361 | 0.024088108 | 0.024800077 |
| GH92  | 0.604710348 | 1.51177587  | 0.05098848  | 0.049603133 |
| GH71  | 0.602692146 | 1.541770607 | 2.80E-06    | 3.10E-06    |
| GH5   | 0.543184699 | 1.57237676  | 0.016389033 | 0.016703077 |
| GH63  | 0.572734849 | 1.575020835 | 0.004065447 | 0.003945292 |
| GH82  | 0.601460094 | 1.575252626 | 0.000187794 | 0.00020179  |
| GH1   | 0.592412526 | 1.589399459 | 0.008514196 | 0.009294022 |
| GH11  | 0.566971611 | 1.599150698 | 0.001636856 | 0.001704729 |
| GH20  | 0.539598071 | 1.604210481 | 0.038784531 | 0.037615286 |
| GH2   | 0.53741307  | 1.642095492 | 0.086937382 | 0.08572962  |
| GH80  | 0.535510053 | 1.683031596 | 2.81E-06    | 3.16E-06    |
| GH9   | 0.532172875 | 1.721735771 | 0.003859172 | 0.004185911 |
| GH123 | 0.52175488  | 1.739182934 | 0.005233045 | 0.004921073 |
| GH98  | 0.519888019 | 1.787115065 | 0.000195431 | 0.000212563 |

|       |             |             |             |             |
|-------|-------------|-------------|-------------|-------------|
| GH97  | 0.51713533  | 1.834996333 | 0.022485967 | 0.021573315 |
| GH64  | 0.516592007 | 1.894170692 | 3.96E-06    | 4.44E-06    |
| GH48  | 0.514764748 | 1.952555942 | 0.000230959 | 0.000250192 |
| GH44  | 0.514764748 | 2.022290082 | 0.000230959 | 0.000250192 |
| GH25  | 0.501253291 | 2.042143037 | 0.012496974 | 0.013489609 |
| GH70  | 0.227152401 | 2.082230342 | 0.000145118 | 0.000204692 |
| GH101 | 0.500539565 | 2.117667389 | 0.000252563 | 0.000291636 |
| GH8   | 0.443469642 | 2.120941767 | 0.001096228 | 0.001220736 |
| GH126 | 0.38841601  | 2.136288054 | 0.000196369 | 0.000244662 |
| GH103 | 0.469412907 | 2.151475823 | 0.000497387 | 0.000592038 |
| GH110 | 0.489863429 | 2.155399086 | 0.005411129 | 0.005193909 |
| GH10  | 0.432020755 | 2.160103773 | 0.002711299 | 0.002805208 |
| GH124 | 0.418654144 | 2.192950277 | 0.00048995  | 0.000540602 |
| GH59  | 0.219462771 | 2.194627705 | 0.000275659 | 0.000318506 |
| GH19  | 0.383511942 | 2.220332293 | 3.62E-05    | 4.14E-05    |
| GH14  | 0.265100933 | 2.243161739 | 5.44E-05    | 6.63E-05    |
| GH87  | 0.16834734  | 2.314775921 | 8.19E-05    | 0.000114243 |
| GH62  | 0.382379993 | 2.336766625 | 9.19E-05    | 0.000105744 |
| GH74  | 0.363354037 | 2.351114355 | 0.005563735 | 0.006131377 |
| GH61  | 0.215813739 | 2.373951128 | 1.64E-05    | 2.29E-05    |
| GH81  | 0.152960259 | 2.403661213 | 2.24E-05    | 3.58E-05    |
| GH85  | 0.353222358 | 2.428403712 | 0.000204817 | 0.000233229 |
| GH68  | 0.200695725 | 2.452947745 | 7.61E-05    | 0.000105597 |
| GH130 | 0.337163148 | 2.472529749 | 0.016543869 | 0.016336056 |
| GH6   | 0.321463237 | 2.525782578 | 2.06E-05    | 2.48E-05    |
| GH52  | 0.152960259 | 2.804271416 | 1.68E-05    | 2.68E-05    |
| GH119 | 0.152960259 | 3.365125699 | 5.60E-06    | 8.94E-06    |
| GH128 | 0.137276751 | 3.775110662 | 6.76E-06    | 1.03E-05    |
| GH45  | 0.137276751 | 5.033480883 | 6.76E-06    | 1.03E-05    |
| GH12  | 0.127873096 | 7.033020278 | 8.40E-06    | 1.20E-05    |
| GH17  | 0.107724968 | 11.84974646 | 1.16E-05    | 1.56E-05    |



**Table S13. Genes significantly differentially regulated (>1.2 fold change and q<5%) in *B. theta* mono-associated Fut2<sup>-</sup> versus Fut2<sup>+</sup> mice fed a PD diet.**

| <b>Genes upregulated in Fuc-</b> |                                                                      |                    |                   |
|----------------------------------|----------------------------------------------------------------------|--------------------|-------------------|
| <b>Gene ID</b>                   | <b>Annotation</b>                                                    | <b>Fold Change</b> | <b>q-value(%)</b> |
| BT0026                           | putative transposase                                                 | 1.46               | 2.05              |
| BT0027                           | putative transposase                                                 | 1.37               | 2.22              |
| BT0057                           | hypothetical protein                                                 | 1.2                | 2.16              |
| BT0059                           | conserved hypothetical protein                                       | 1.24               | 3.74              |
| BT0061                           | putative tyrosine-protein kinase ptk                                 | 1.31               | 1.65              |
| BT0072                           | putative ABC transporter, ATP-binding protein                        | 1.26               | 2.22              |
| BT0073                           | putative ABC transporter, ATP-binding protein                        | 1.31               | 1.49              |
| BT0074                           | Peptidase S24 and S26, C-terminal                                    | 1.4                | 0                 |
| BT0123                           | NADH-ubiquinone oxidoreductase subunit                               | 1.34               | 2.22              |
| BT0130                           | putative oxidoreductase                                              | 1.21               | 2.22              |
| BT0163                           | putative outer membrane protein                                      | 1.35               | 2.22              |
| BT0164                           | putative outer membrane protein, alpha-2-macroglobulin-like          | 1.38               | 2.05              |
| BT0260                           | acyltransferase family protein                                       | 1.34               | 2.16              |
| BT0284                           | putative peptidoglycan binding protein (LPXTG motif)                 | 1.45               | 3.53              |
| BT0297                           | putative outer membrane lipoprotein silC precursor                   | 1.4                | 1.65              |
| BT0298                           | cation efflux system protein (outer membrane protein)                | 1.3                | 3.53              |
| BT0299                           | cation efflux system (AcrB/AcrD/AcrF family)                         | 1.27               | 2.22              |
| BT0300                           | cation efflux system (AcrB/AcrD/AcrF family)                         | 1.3                | 0                 |
| BT0301                           | ATP-binding transport protein natA (Na <sup>+</sup> ABC transporter) | 1.39               | 3.28              |
| BT0317                           | SusC homolog                                                         | 1.29               | 3.28              |
| BT0318                           | SusD homolog                                                         | 1.36               | 3.53              |
| BT0319                           | conserved hypothetical protein                                       | 1.33               | 2.22              |
| BT0346                           | ribose 5-phosphate isomerase B                                       | 1.25               | 3.28              |
| BT0433                           | putative xylose repressor                                            | 1.23               | 2.22              |

|        |                                                    |      |      |
|--------|----------------------------------------------------|------|------|
| BT0434 | Pyridine nucleotide-disulphide o                   | 1.47 | 1.49 |
| BT0435 | Twin-arginine translocation pathway signal         | 1.56 | 2.22 |
| BT0436 | arabinose-proton symporter                         | 1.58 | 2.22 |
| BT0437 | N-acylglucosamine 2-epimerase                      | 1.83 | 4.24 |
| BT0439 | SusC homolog                                       | 1.83 | 2.22 |
| BT0440 | SusD homolog                                       | 1.73 | 4.16 |
| BT0441 | putative chitobiase                                | 1.66 | 4.69 |
| BT0442 | glycerophosphoryl diester phosphodiesterase        | 1.62 | 5.69 |
| BT0444 | hypothetical protein                               | 1.51 | 2.22 |
| BT0454 | arabinose-proton symporter (Arabinose transporter) | 1.54 | 2.63 |
| BT0542 | tRNA/rRNA methyltransferase, SpoU                  | 1.23 | 3.28 |
| BT0558 | mannose-1-phosphate guanylyltransferase            | 1.22 | 4.71 |
| BT0562 | putative ABC transporter ATP-binding protein       | 1.22 | 2.22 |
| BT0623 | putative UDP-glucose 4-epimerase                   | 1.22 | 4.71 |
| BT0659 | conserved hypothetical protein                     | 1.51 | 2.22 |
| BT0669 | putative cation efflux system protein              | 1.64 | 0    |
| BT0671 | outer membrane protein TolC, putative              | 1.46 | 2.22 |
| BT0672 | drug efflux protein                                | 1.34 | 2.22 |
| BT0673 | NADP(H) oxidoreductase                             | 1.34 | 1.49 |
| BT0693 | putative ABC transport system, membrane protein... | 1.23 | 4.24 |
| BT0726 | conserved hypothetical protein                     | 1.36 | 2.05 |
| BT0764 | hypothetical protein                               | 1.31 | 1.49 |
| BT0765 | putative protease                                  | 1.4  | 0    |
| BT0780 | acetyltransferase                                  | 1.31 | 2.22 |
| BT0781 | conserved hypothetical protein                     | 1.32 | 2.22 |
| BT0785 | glutamine synthetase I                             | 1.22 | 3.53 |
| BT0881 | conserved hypothetical protein                     | 1.42 | 2.63 |
| BT1078 | putative transcriptional regulator                 | 1.26 | 4.24 |

|        |                                                          |      |      |
|--------|----------------------------------------------------------|------|------|
| BT1088 | conserved hypothetical protein                           | 1.25 | 4.16 |
| BT1099 | putative arginase                                        | 1.23 | 2.22 |
| BT1100 | alpha-glucan phosphorylase , GT_35                       | 1.34 | 4.24 |
| BT1102 | 6-phosphofructokinase                                    | 1.3  | 4.16 |
| BT1105 | phosphoglycerate mutase 1                                | 1.22 | 3.28 |
| BT1108 | Multiple antibiotic resistance (MarC)-related proteins   | 1.34 | 2.22 |
| BT1109 | ferritin A                                               | 1.31 | 2.22 |
| BT1170 | hypothetical protein                                     | 1.51 | 0    |
| BT1200 | conserved hypothetical protein                           | 1.4  | 3.28 |
| BT1247 | Peptidase M14, carboxypeptidase                          | 1.3  | 2.05 |
| BT1329 | putative thiol peroxidase                                | 1.22 | 4.71 |
| BT1337 | putative aminopeptidase C , CPS 4                        | 1.37 | 3.74 |
| BT1366 | conserved hypothetical protein                           | 1.27 | 3.28 |
| BT1383 | oxidoreductase, aldo/keto reductase                      | 1.2  | 2.22 |
| BT1411 | methylated-DNA--protein-cysteine methyltransferase       | 1.28 | 2.22 |
| BT1425 | conserved hypothetical protein                           | 1.23 | 3.53 |
| BT1501 | major outer membrane protein OmpA                        | 1.6  | 3.28 |
| BT1502 | conserved hypothetical protein                           | 1.63 | 2.22 |
| BT1507 | conserved hypothetical protein                           | 2.25 | 2.22 |
| BT1512 | conserved hypothetical protein, putative surface protein | 1.27 | 4.24 |
| BT1554 | alanine dehydrogenase                                    | 1.53 | 2.05 |
| BT1556 | conserved hypothetical protein                           | 1.37 | 4.16 |
| BT1557 | conserved hypothetical protein                           | 1.53 | 1.65 |
| BT1558 | conserved hypothetical protein                           | 1.49 | 0    |
| BT1559 | RNA polymerase ECF-type sigma factor                     | 1.36 | 1.65 |
| BT1590 | hypothetical protein                                     | 1.52 | 1.65 |
| BT1591 | conserved hypothetical protein                           | 1.56 | 0    |
| BT1624 | putative secreted sulfatase                              | 1.21 | 3.74 |

|        |                                                                 |      |      |
|--------|-----------------------------------------------------------------|------|------|
| BT1627 | beta-hexosaminidase precursor , GH_20                           | 1.28 | 2.22 |
| BT1661 | two-component system sensor histidine kinase                    | 1.22 | 2.22 |
| BT1720 | phosphoenolpyruvate phosphomutase precursor , CPS 6             | 1.33 | 4.71 |
| BT1777 | glycoside hydrolase family 95                                   | 1.21 | 1.65 |
| BT1784 | conserved hypothetical protein                                  | 1.39 | 2.22 |
| BT1800 | putative two-component system sensor histidine kinase           | 1.34 | 2.16 |
| BT1801 | two-component system sensor histidine kinase                    | 1.22 | 4.71 |
| BT1802 | two-component system sensor histidine kinase                    | 1.28 | 3.28 |
| BT1810 | GAF domain-containing protein, involved in signal transduction  | 1.43 | 0    |
| BT1838 | putative alanyl dipeptidyl peptidase                            | 1.39 | 4.16 |
| BT1839 | conserved hypothetical protein                                  | 1.24 | 2.22 |
| BT1924 | putative metal-dependent hydrolase                              | 1.3  | 1.65 |
| BT1932 | putative transposase                                            | 1.25 | 2.63 |
| BT1980 | transposase                                                     | 1.3  | 2.22 |
| BT1988 | conserved hypothetical protein                                  | 1.28 | 1.65 |
| BT1994 | conserved hypothetical protein                                  | 1.62 | 2.63 |
| BT1995 | hypothetical protein                                            | 1.6  | 3.53 |
| BT2030 | conserved hypothetical protein                                  | 1.22 | 3.53 |
| BT2087 | conserved hypothetical protein                                  | 1.34 | 4.16 |
| BT2097 | Six-hairpin glycosidase                                         | 1.39 | 0    |
| BT2117 | outer membrane protein, putative                                | 1.63 | 2.22 |
| BT2118 | transporter, AcrB/D/F family                                    | 1.6  | 4.16 |
| BT2119 | transmembrane protein precursor, possibly involved in transport | 1.66 | 2.22 |
| BT2170 | conserved hypothetical protein                                  | 1.55 | 2.22 |
| BT2235 | Ribbon-helix-helix                                              | 1.25 | 4.71 |
| BT2240 | TPR-domain containing protein                                   | 1.22 | 1.65 |
| BT2297 | putative reverse transcriptase                                  | 1.24 | 4.71 |
| BT2374 | conserved hypothetical protein                                  | 1.24 | 2.22 |

|        |                                                                                                  |      |      |
|--------|--------------------------------------------------------------------------------------------------|------|------|
| BT2385 | conserved hypothetical protein                                                                   | 1.26 | 4.16 |
| BT2386 | AsnC family transcriptional regulator                                                            | 1.23 | 4.71 |
| BT2392 | NHL repeat-containing protein                                                                    | 2.86 | 3.53 |
| BT2393 | SusC homolog                                                                                     | 3.09 | 3.28 |
| BT2394 | SusD homolog                                                                                     | 3.77 | 2.22 |
| BT2395 | hypothetical protein                                                                             | 3.66 | 2.22 |
| BT2485 | major outer membrane protein OmpA                                                                | 1.21 | 4.69 |
| BT2486 | Collagen triple helix repeat                                                                     | 1.61 | 1.65 |
| BT2522 | Xaa-Pro aminopeptidase                                                                           | 1.22 | 4.71 |
| BT2550 | beta-glucanase precursor , GH_13                                                                 | 1.23 | 3.28 |
| BT2559 | SusD homolog                                                                                     | 1.28 | 4.71 |
| BT2628 | two-component system sensor histidine kinase/response regulator, hybrid ( one-component system ) | 1.34 | 2.16 |
| BT2629 | putative alpha-1,2-mannosidase , GH_92                                                           | 1.51 | 0    |
| BT2630 | conserved hypothetical protein with endonuclease/exonuclease/phosphatase family domain           | 1.22 | 2.22 |
| BT2691 | methenyltetrahydrofolate cyclohydrolase                                                          | 1.47 | 4.24 |
| BT2694 | putative urocanate hydratase                                                                     | 1.4  | 3.53 |
| BT2695 | conserved hypothetical protein                                                                   | 1.28 | 2.63 |
| BT2750 | putative protein-tyrosine-phosphatase                                                            | 1.29 | 3.74 |
| BT2771 | putative serine/threonine-protein kinase pknB                                                    | 1.27 | 2.63 |
| BT2784 | hypothetical protein                                                                             | 1.65 | 2.22 |
| BT2927 | putative cell wall-associated protein precursor                                                  | 1.28 | 3.74 |
| BT2975 | putative nicotinate mononucleotide:5,6-dimethylbenzimidazole phosphoribosyltransferase           | 1.28 | 1.65 |
| BT3004 | SWIM Zn-finger domain protein                                                                    | 1.21 | 2.22 |
| BT3057 | N-acetylgalactosamine-6-sulfatase precursor                                                      | 1.41 | 3.53 |
| BT3059 | Quinonprotein alcohol dehydrogenase                                                              | 2.89 | 0    |
| BT3060 | EGF-like region                                                                                  | 1.93 | 2.05 |
| BT3061 | putative transmembrane protein                                                                   | 2.3  | 0    |

|        |                                                                              |      |      |
|--------|------------------------------------------------------------------------------|------|------|
| BT3086 | alpha-glucosidase II , GH_31                                                 | 3.2  | 0    |
| BT3087 | cycloisomaltooligosaccharide glucoanotransferase , GH_66                     | 2.24 | 0    |
| BT3088 | conserved hypothetical protein                                               | 2.56 | 0    |
| BT3089 | SusD homolog                                                                 | 2.03 | 0    |
| BT3090 | SusC homolog                                                                 | 2.62 | 0    |
| BT3114 | beta-galactosidase , GH_2                                                    | 1.2  | 3.74 |
| BT3115 | putative proline dehydrogenase/delta-1-pyrroline-5-carboxylate dehydrogenase | 1.77 | 3.28 |
| BT3125 | hypothetical protein                                                         | 1.41 | 2.22 |
| BT3169 | alpha-xylosidase , GH_31                                                     | 1.67 | 4.24 |
| BT3170 | Intradiol ring-cleavage dioxygen                                             | 1.26 | 4.24 |
| BT3196 | transcriptional regulator                                                    | 1.23 | 4.24 |
| BT3206 | hypothetical protein                                                         | 1.28 | 2.22 |
| BT3232 | gluconate 5-dehydrogenase                                                    | 1.24 | 4.71 |
| BT3233 | Galactose mutarotase-like                                                    | 1.35 | 2.22 |
| BT3234 | conserved hypothetical protein                                               | 1.48 | 0    |
| BT3235 | conserved hypothetical protein                                               | 3.23 | 4.69 |
| BT3236 | conserved hypothetical protein                                               | 3.28 | 4.71 |
| BT3237 | Peptidase M, neutral zinc metallopeptidases, zinc-binding site               | 3.1  | 4.69 |
| BT3238 | SusD homolog                                                                 | 3.13 | 5.69 |
| BT3239 | SusC homolog                                                                 | 2.82 | 4.71 |
| BT3294 | putative alpha-glucosidase , GH_97                                           | 1.24 | 2.22 |
| BT3411 | pyrophosphate-energized vacuolar membrane proton pump                        | 1.46 | 3.74 |
| BT3432 | conserved hypothetical protein                                               | 1.21 | 3.28 |
| BT3467 | putative glycosylhydrolase , GH_43                                           | 1.26 | 1.49 |
| BT3508 | conserved hypothetical protein                                               | 1.29 | 4.69 |
| BT3509 | Calreticulin/calnexin                                                        | 1.29 | 2.22 |
| BT3510 | hypothetical protein                                                         | 1.21 | 4.24 |
| BT3527 | alpha-1,2-mannosidase , GH_92                                                | 1.24 | 3.74 |

|        |                                                                                                  |      |      |
|--------|--------------------------------------------------------------------------------------------------|------|------|
| BT3528 | Uncharacterised conserved protein UCP28846                                                       | 1.25 | 3.74 |
| BT3529 | aldose 1-epimerase precursor                                                                     | 1.26 | 3.74 |
| BT3572 | hypothetical protein                                                                             | 1.32 | 2.16 |
| BT3673 | TonB                                                                                             | 1.61 | 3.28 |
| BT3721 | conserved hypothetical protein                                                                   | 1.3  | 0    |
| BT3784 | putative alpha-1,2-mannosidase , GH_92                                                           | 1.35 | 2.22 |
| BT3786 | two-component system sensor histidine kinase/response regulator, hybrid ( one-component system ) | 1.22 | 2.05 |
| BT3854 | SusC homolog                                                                                     | 1.32 | 2.63 |
| BT3855 | SusD homolog                                                                                     | 1.29 | 4.24 |
| BT3857 | Flavodoxin                                                                                       | 1.24 | 2.22 |
| BT3874 | conserved hypothetical protein                                                                   | 1.73 | 0    |
| BT3886 | conserved hypothetical protein                                                                   | 1.38 | 0    |
| BT3896 | TonB                                                                                             | 1.47 | 0    |
| BT3897 | putative thiol:disulfide interchange protein DsbE                                                | 1.23 | 3.74 |
| BT3993 | RNA polymerase ECF-type sigma factor                                                             | 1.29 | 0    |
| BT3994 | putative alpha-1,2-mannosidase , GH_92                                                           | 1.32 | 3.74 |
| BT4034 | hypothetical protein                                                                             | 1.25 | 4.24 |
| BT4035 | Helix-turn-helix type 3                                                                          | 1.3  | 4.16 |
| BT4038 | SusD homolog                                                                                     | 1.43 | 1.65 |
| BT4039 | SusC homolog                                                                                     | 1.38 | 2.16 |
| BT4040 | putative galactose oxidase precursor                                                             | 1.39 | 2.22 |
| BT4137 | two-component system sensor histidine kinase/response regulator, hybrid ( one-component system ) | 1.21 | 2.22 |
| BT4199 | putative transcriptional regulator                                                               | 1.28 | 4.69 |
| BT4200 | putative transcriptional regulator                                                               | 1.33 | 4.24 |
| BT4201 | putative transcriptional regulator                                                               | 1.23 | 3.74 |
| BT4202 | hypothetical protein                                                                             | 1.51 | 3.74 |
| BT4221 | conserved hypothetical protein                                                                   | 1.27 | 1.65 |

|                                  |                                                                |                    |                   |
|----------------------------------|----------------------------------------------------------------|--------------------|-------------------|
| BT4241                           | beta-galactosidase , GH_2                                      | 1.44               | 3.28              |
| BT4242                           | putative transporter                                           | 1.37               | 3.74              |
| BT4243                           | Hexosaminidase, GH_109                                         | 1.49               | 2.05              |
| BT4244                           | Coagulation factor 5/8 type, C-terminal                        | 2.44               | 0                 |
| BT4245                           | Coagulation factor 5/8 type, C-terminal                        | 2.08               | 1.49              |
| BT4246                           | SusD homolog                                                   | 1.98               | 2.22              |
| BT4247                           | SusC homolog                                                   | 1.8                | 1.65              |
| BT4248                           | putative anti-sigma factor                                     | 2.13               | 4.24              |
| BT4249                           | conserved hypothetical protein                                 | 1.85               | 1.49              |
| BT4287                           | hypothetical protein                                           | 1.58               | 3.53              |
| BT4304                           | glycoside transferase family 4                                 | 1.24               | 2.22              |
| BT4305                           | putative alpha-amylase , GH_57                                 | 1.21               | 4.16              |
| BT4311                           | glucose/galactose transporter                                  | 1.35               | 4.24              |
| BT4337                           | beta-hexosaminidase precursor , GH_20                          | 1.38               | 2.22              |
| BT4343                           | putative DNA helicase                                          | 1.27               | 2.22              |
| BT4359                           | alpha-N-acetylglucosaminidase precursor , GH_89                | 1.31               | 2.22              |
| BT4384                           | conserved hypothetical protein                                 | 1.61               | 0                 |
| BT4408                           | conserved hypothetical protein                                 | 1.54               | 0                 |
| BT4474                           | Gonadotropin, beta chain                                       | 1.26               | 4.16              |
| BT4484                           | MgtC/SapB transporter                                          | 1.26               | 3.28              |
| BT4575                           | Peptidase M, neutral zinc metallopeptidases, zinc-binding site | 1.3                | 2.22              |
| BT4576                           | hypothetical protein                                           | 1.41               | 4.24              |
| BT4652                           | Oligosaccharide lyase                                          | 1.22               | 4.71              |
| BT4656                           | N-acetylglucosamine-6-sulfatase precursor                      | 1.27               | 3.74              |
| BT4718                           | putative aquaporin                                             | 1.45               | 0                 |
|                                  |                                                                |                    |                   |
| <b>Genes upregulated in Fuc+</b> |                                                                |                    |                   |
| <b>Gene ID</b>                   | <b>Annotation</b>                                              | <b>Fold Change</b> | <b>q-value(%)</b> |



|        |                                                                                  |      |      |
|--------|----------------------------------------------------------------------------------|------|------|
| BT0122 | 3-oxoacyl-[acyl-carrier-protein] synthase III                                    | 0.66 | 2.24 |
| BT0153 | conserved hypothetical protein                                                   | 0.7  | 3.74 |
| BT0158 | Na(+)/H(+) antiporter                                                            | 0.69 | 2.58 |
| BT0159 | Rubryerythrin                                                                    | 0.66 | 3.53 |
| BT0178 | conserved hypothetical protein                                                   | 0.71 | 2.24 |
| BT0179 | SsrA-binding protein                                                             | 0.64 | 2.24 |
| BT0180 | 5-methyltetrahydrofolate-homocysteine methyltransferase                          | 0.63 | 2.24 |
| BT0181 | putative NADH dehydrogenase/NAD(P)H nitroreductase                               | 0.68 | 2.63 |
| BT0189 | conserved hypothetical protein, putative anti-sigma factor                       | 0.75 | 2.58 |
| BT0206 | SusC homolog                                                                     | 0.37 | 2.58 |
| BT0207 | SusD homolog                                                                     | 0.39 | 2.58 |
| BT0208 | hypothetical protein                                                             | 0.35 | 2.58 |
| BT0209 | hypothetical protein                                                             | 0.42 | 3.74 |
| BT0210 | leucine-rich repeat protein, function unknown                                    | 0.37 | 5.69 |
| BT0211 | Leucine-rich repeat                                                              | 0.45 | 6.57 |
| BT0236 | Beta tubulin                                                                     | 0.78 | 2.58 |
| BT0246 | putative integral membrane protein, with calcineurin-like phosphoesterase domain | 0.76 | 2.22 |
| BT0247 | conserved hypothetical protein                                                   | 0.73 | 2.22 |
| BT0248 | RNA polymerase ECF-type sigma factor                                             | 0.75 | 2.24 |
| BT0307 | phosphofructokinase                                                              | 0.81 | 2.58 |
| BT0308 | glycoside hydrolase family 25                                                    | 0.57 | 4.69 |
| BT0376 | putative transcriptional regulator , CPS 1                                       | 0.7  | 3.53 |
| BT0377 | conserved hypothetical protein , CPS 1                                           | 0.72 | 3.74 |
| BT0377 | conserved hypothetical protein , CPS 1                                           | 0.73 | 4.24 |
| BT0379 | UDP-glucose 6-dehydrogenase , CPS 1                                              | 0.78 | 4.71 |
| BT0381 | capsular polysaccharide biosynthesis protein capD , CPS 1                        | 0.71 | 4.69 |
| BT0382 | capsular polysaccharide biosynthesis protein Cps4K , CPS 1                       | 0.79 | 4.24 |
| BT0412 | putative Na <sup>+</sup> /sulfate symporter                                      | 0.81 | 4.24 |

|        |                                                            |      |      |
|--------|------------------------------------------------------------|------|------|
| BT0413 | putative adenylsulfate kinase                              | 0.72 | 3.31 |
| BT0415 | sulfate adenyltransferase subunit 1/adenylsulfate kinase   | 0.77 | 3.31 |
| BT0416 | possible sulfotransferase                                  | 0.8  | 2.58 |
| BT0417 | conserved hypothetical protein                             | 0.78 | 3.53 |
| BT0421 | tetratricopeptide repeat (TPR) family protein              | 0.79 | 2.24 |
| BT0423 | translation initiation factor IF-3                         | 0.78 | 2.24 |
| BT0424 | 50S ribosomal protein L35                                  | 0.7  | 3.74 |
| BT0425 | 50S ribosomal protein L20                                  | 0.72 | 3.31 |
| BT0426 | 4Fe-4S ferredoxin, iron-sulfur binding                     | 0.75 | 3.53 |
| BT0427 | xanthine phosphoribosyltransferase                         | 0.62 | 3.74 |
| BT0431 | putative aminodeoxychorismate lyase                        | 0.68 | 2.63 |
| BT0432 | putative endonuclease BB0411                               | 0.8  | 4.71 |
| BT0502 | TonB-dependent outer membrane receptor                     | 0.5  | 4.69 |
| BT0503 | conserved hypothetical protein                             | 0.66 | 4.16 |
| BT0504 | TonB-dependent outer membrane receptor                     | 0.65 | 3.74 |
| BT0505 | Transcription factor, MADS-box                             | 0.69 | 4.24 |
| BT0521 | putative acetyl transferase                                | 0.62 | 0    |
| BT0522 | putative capsule-related protein                           | 0.53 | 2.02 |
| BT0523 | putative glycosyltransferase                               | 0.69 | 3.53 |
| BT0539 | putative Na <sup>+</sup> /sulphate transporter             | 0.83 | 4.16 |
| BT0556 | carbamoyl phosphate synthetase III (glutamine-hydrolyzing) | 0.79 | 3.31 |
| BT0573 | lipoprotein protein, putative                              | 0.79 | 2.22 |
| BT0578 | excinuclease ABC subunit A                                 | 0.77 | 2.58 |
| BT0579 | putative transcription regulator                           | 0.78 | 3.74 |
| BT0589 | putative inner membrane protein translocase com...         | 0.71 | 2.24 |
| BT0590 | CTP synthase (UTP-ammonia ligase)                          | 0.73 | 0    |
| BT0603 | conserved hypothetical protein , CPS 3                     | 0.73 | 4.71 |
| BT0616 | Positive regulator of sigma(E),                            | 0.65 | 4.16 |

|        |                                                                                                       |      |      |
|--------|-------------------------------------------------------------------------------------------------------|------|------|
| BT0617 | Na <sup>+</sup> -transporting NADH:ubiquinone oxidoreductase, Electron transport complex protein rnfB | 0.58 | 0    |
| BT0618 | Na <sup>+</sup> -transporting NADH:ubiquinone oxidoreductase, Electron transport complex protein rnfC | 0.58 | 2.02 |
| BT0619 | Na <sup>+</sup> -transporting NADH:ubiquinone oxidoreductase, Electron transport complex protein rnfD | 0.61 | 2.05 |
| BT0620 | Na <sup>+</sup> -transporting NADH:ubiquinone oxidoreductase, Electron transport complex protein rnfG | 0.6  | 1.49 |
| BT0621 | Na <sup>+</sup> -transporting NADH:ubiquinone oxidoreductase, Electron transport complex protein rnfE | 0.56 | 2.05 |
| BT0622 | Na <sup>+</sup> -transporting NADH:ubiquinone oxidoreductase, Electron transport complex protein rnfA | 0.63 | 2.58 |
| BT0626 | phenylalanyl-tRNA synthetase beta chain                                                               | 0.66 | 2.24 |
| BT0627 | conserved hypothetical protein, with a conserved domain of unknown function                           | 0.69 | 2.05 |
| BT0637 | DNA recombination protein rmuC homolog                                                                | 0.81 | 4.24 |
| BT0674 | carboxynorspermidine decarboxylase                                                                    | 0.72 | 2.29 |
| BT0675 | N-acetylglucosamine-6-phosphate deacetylase                                                           | 0.65 | 2.58 |
| BT0676 | N-acetylglucosamine-6-phosphate deacetylase                                                           | 0.65 | 3.74 |
| BT0684 | putative long-chain-fatty-acid--CoA ligase                                                            | 0.62 | 4.24 |
| BT0698 | 3-methyl-2-oxobutanoate hydroxymethyltransferase                                                      | 0.53 | 2.58 |
| BT0699 | putative sugar transporter                                                                            | 0.63 | 4.16 |
| BT0703 | conserved hypothetical protein                                                                        | 0.7  | 2.05 |
| BT0743 | penicillin-binding protein 1A (PBP-1a) , GT_51                                                        | 0.78 | 4.69 |
| BT0744 | 2-amino-4-hydroxy-6- hydroxymethylidihydropteridine pyrophosphokinase                                 | 0.63 | 2.22 |
| BT0745 | 3-deoxy-manno-octulosonate cytidyltransferase                                                         | 0.63 | 2.63 |
| BT0746 | putative zinc protease                                                                                | 0.61 | 2.22 |
| BT0752 | putative RNA polymerase ECF-type sigma factor                                                         | 0.73 | 1.49 |
| BT0767 | putative para-aminobenzoate synthase component I                                                      | 0.73 | 4.24 |
| BT0768 | putative para-aminobenzoate synthase component I                                                      | 0.74 | 2.02 |
| BT0806 | isoleucyl-tRNA synthetase                                                                             | 0.74 | 3.53 |

|        |                                                                    |      |      |
|--------|--------------------------------------------------------------------|------|------|
| BT0809 | putative lipoprotein                                               | 0.73 | 2.63 |
| BT0810 | conserved hypothetical protein                                     | 0.76 | 2.22 |
| BT0821 | putative permease                                                  | 0.76 | 2.02 |
| BT0822 | putative metallo-beta-lactamase superfamily hydrolase              | 0.69 | 2.24 |
| BT0829 | UDP-glucose 6-dehydrogenase                                        | 0.71 | 2.24 |
| BT0834 | putative permease                                                  | 0.56 | 2.24 |
| BT0835 | tRNA-guanine transglycosylase                                      | 0.72 | 2.58 |
| BT0836 | ATP-dependent protease                                             | 0.77 | 4.69 |
| BT0837 | ATP-dependent protease                                             | 0.75 | 3.53 |
| BT0870 | 8-amino-7-oxononanoate synthase                                    | 0.72 | 3.31 |
| BT0873 | putative sulfatase                                                 | 0.61 | 2.58 |
| BT0883 | conserved hypothetical protein                                     | 0.75 | 3.74 |
| BT0905 | BatC, conserved hypothetical protein                               | 0.72 | 2.63 |
| BT0906 | BatB, conserved hypothetical protein                               | 0.72 | 3.53 |
| BT0907 | BatA (Bacteroides aerotolerance operon)                            | 0.72 | 2.58 |
| BT0908 | putative conserved membrane exported protein                       | 0.74 | 2.24 |
| BT0920 | putative O-sialoglycoprotein endopeptidase                         | 0.78 | 2.58 |
| BT0924 | S-layer domain                                                     | 0.72 | 4.69 |
| BT0925 | ABC transporter, ATP-binding protein                               | 0.7  | 3.74 |
| BT0929 | prolyl-tRNA synthetase                                             | 0.77 | 4.24 |
| BT0973 | conserved hypothetical protein                                     | 0.57 | 4.69 |
| BT0974 | conserved hypothetical protein, putative integral membrane protein | 0.48 | 3.74 |
| BT0975 | conserved hypothetical protein, putative integral membrane protein | 0.56 | 4.16 |
| BT0999 | putative acetyltransferase                                         | 0.69 | 3.31 |
| BT1008 | xylanase                                                           | 0.48 | 4.16 |
| BT1054 | ATP-dependent helicase                                             | 0.77 | 2.22 |
| BT1055 | pyruvate formate-lyase activating enzyme                           | 0.72 | 2.29 |

|        |                                                               |      |      |
|--------|---------------------------------------------------------------|------|------|
| BT1084 | conserved hypothetical protein                                | 0.81 | 3.53 |
| BT1158 | Na <sup>+</sup> -translocating NADH-quinone reductase subunit | 0.79 | 3.31 |
| BT1159 | Na <sup>+</sup> -translocating NADH-quinone reductase subunit | 0.79 | 3.53 |
| BT1160 | Na <sup>+</sup> -translocating NADH-quinone reductase subunit | 0.8  | 3.53 |
| BT1162 | putative outer membrane protein                               | 0.75 | 2.58 |
| BT1165 | putative transmembrane surface-related protein ...            | 0.83 | 2.58 |
| BT1166 | glycoside transferase family 2                                | 0.77 | 4.24 |
| BT1177 | putative polysaccharide biosynthesis protein                  | 0.75 | 2.24 |
| BT1204 | Carboxypeptidase regulatory region                            | 0.74 | 2.29 |
| BT1205 | putative ATPase, AAA family                                   | 0.71 | 2.22 |
| BT1206 | conserved hypothetical protein                                | 0.56 | 3.31 |
| BT1207 | glycerate dehydrogenase (NADH-dependent)                      | 0.67 | 4.16 |
| BT1208 | Cellular Component: integral to membrane (GO:1621)            | 0.63 | 3.31 |
| BT1229 | putative antiporter                                           | 0.72 | 3.31 |
| BT1270 | putative Na <sup>+</sup> /H <sup>+</sup> antiporter           | 0.83 | 3.31 |
| BT1271 | 30S ribosomal protein S16                                     | 0.72 | 3.31 |
| BT1273 | L-fucose isomerase                                            | 0.63 | 3.53 |
| BT1274 | L-fuculose-1-phosphate aldolase                               | 0.64 | 3.74 |
| BT1275 | L-fuculose kinase                                             | 0.64 | 2.58 |
| BT1276 | mutarotase                                                    | 0.62 | 2.24 |
| BT1277 | L-fucose permease                                             | 0.62 | 2.58 |
| BT1288 | spermidine/putrescine ABC transporter                         | 0.64 | 4.24 |
| BT1289 | putrescine transport system permease protein potI             | 0.6  | 4.69 |
| BT1307 | hypothetical protein                                          | 0.65 | 4.16 |
| BT1326 | TPR-domain containing protein                                 | 0.67 | 2.05 |
| BT1327 | putative alkaline phosphatase                                 | 0.73 | 3.31 |
| BT1359 | Tetratricopeptide repeat family protein                       | 0.76 | 3.31 |
| BT1360 | tRNA/rRNA methyltransferase                                   | 0.72 | 2.24 |

|        |                                                           |      |      |
|--------|-----------------------------------------------------------|------|------|
| BT1362 | flavoprotein                                              | 0.76 | 2.22 |
| BT1363 | DNA Pol III Epsilon Chain                                 | 0.81 | 3.74 |
| BT1367 | hydrolase, metal-dependent                                | 0.75 | 4.69 |
| BT1376 | putative ATP-binding protein involved in cell division    | 0.78 | 4.24 |
| BT1445 | putative biotin synthesis protein bioC                    | 0.66 | 4.24 |
| BT1446 | dethiobiotin synthetase                                   | 0.69 | 3.31 |
| BT1472 | glycoside transferase family 2                            | 0.73 | 2.58 |
| BT1474 | ribosomal protein S6 modification protein-related protein | 0.67 | 3.31 |
| BT1475 | ABC transporter, permease protein                         | 0.74 | 2.63 |
| BT1478 | putative histidinol-phosphatase                           | 0.75 | 3.31 |
| BT1479 | ABC transporter ATP-binding protein                       | 0.81 | 2.24 |
| BT1521 | putative membrane protein                                 | 0.74 | 3.53 |
| BT1522 | putative aureobasidin A resistance protein                | 0.57 | 2.24 |
| BT1523 | CDP-diacylglycerol-inositol 3-phosphatidyltransferase     | 0.57 | 2.29 |
| BT1524 | hypothetical protein                                      | 0.53 | 2.22 |
| BT1525 | phosphatidylglycerophosphatase A                          | 0.58 | 2.22 |
| BT1526 | myo-inositol-1-phosphate synthase                         | 0.79 | 2.02 |
| BT1551 | Peptidase M1A and M12B                                    | 0.51 | 2.58 |
| BT1552 | SusC homolog                                              | 0.53 | 3.74 |
| BT1553 | SusD homolog                                              | 0.43 | 3.74 |
| BT1564 | putative GTP-cyclohydrolase protein                       | 0.65 | 4.24 |
| BT1599 | BexA, membrane protein                                    | 0.71 | 2.29 |
| BT1600 | BexA, membrane proein                                     | 0.7  | 2.02 |
| BT1601 | putative signal recognition protein                       | 0.76 | 2.24 |
| BT1608 | capsule biosynthesis protein capA                         | 0.81 | 4.24 |
| BT1617 | RNA polymerase ECF-type sigma factor                      | 0.76 | 2.22 |
| BT1618 | putative anti-sigma factor                                | 0.61 | 3.74 |
| BT1619 | SusC homolog                                              | 0.51 | 4.71 |

|        |                                                   |      |      |
|--------|---------------------------------------------------|------|------|
| BT1620 | SusD homolog                                      | 0.49 | 4.69 |
| BT1621 | beta-hexosaminidase precursor , GH_20             | 0.51 | 6.57 |
| BT1622 | N-acetylgalactosamine-6-sulfatase precursor       | 0.58 | 6.57 |
| BT1662 | putative molybdenum transport ATP-binding protein | 0.79 | 2.02 |
| BT1669 | phenylalanyl-tRNA synthetase alpha chain          | 0.66 | 2.02 |
| BT1670 | putative transmembrane transport protein          | 0.62 | 2.58 |
| BT1671 | endonuclease III                                  | 0.73 | 2.29 |
| BT1673 | thiamine biosynthesis protein, putative           | 0.75 | 4.71 |
| BT1696 | oxaloacetate decarboxylase beta chain             | 0.8  | 3.31 |
| BT1697 | pyruvate carboxylase subunit B                    | 0.79 | 4.24 |
| BT1729 | peptide chain release factor 3 (RF-3)             | 0.63 | 2.24 |
| BT1730 | putative dTDP-4-dehydrorhamnose reductase         | 0.63 | 3.74 |
| BT1731 | conserved hypothetical protein                    | 0.76 | 2.63 |
| BT1736 | chromate transport protein                        | 0.82 | 3.74 |
| BT1805 | electron transfer flavoprotein alpha-subunit      | 0.81 | 2.58 |
| BT1851 | TPR-repeat-containing protein                     | 0.79 | 2.24 |
| BT1855 | putative methyl transferase                       | 0.76 | 4.16 |
| BT1882 | putative thiamine-monophosphate kinase            | 0.8  | 2.63 |
| BT1883 | putative alpha-1,6-mannanase , GH_73              | 0.83 | 2.63 |
| BT1934 | Cyclin-like                                       | 0.76 | 3.31 |
| BT1936 | hypothetical protein                              | 0.82 | 2.22 |
| BT1949 | conserved hypothetical protein                    | 0.63 | 3.53 |
| BT2001 | membrane-associated zinc metalloprotease          | 0.77 | 4.24 |
| BT2004 | RimM protein, required for 16S rRNA processing    | 0.77 | 4.69 |
| BT2013 | putative phosphohydrolases                        | 0.78 | 4.24 |
| BT2014 | 1,4-dihydroxy-2-naphthoate octaprenyltransferase  | 0.81 | 3.74 |
| BT2035 | putative ABC transporter ATP-binding protein      | 0.74 | 3.74 |
| BT2046 | putative cardiolipin synthetase                   | 0.74 | 4.69 |

|        |                                                                                                  |      |      |
|--------|--------------------------------------------------------------------------------------------------|------|------|
| BT2056 | hydrolase, putative                                                                              | 0.81 | 2.22 |
| BT2069 | GCN5-related N-acetyltransferase                                                                 | 0.64 | 3.31 |
| BT2092 | putative membrane protein                                                                        | 0.69 | 4.69 |
| BT2133 | conserved hypothetical protein                                                                   | 0.65 | 2.24 |
| BT2137 | transposase                                                                                      | 0.75 | 2.22 |
| BT2140 | putative sodium-dependent transporter                                                            | 0.77 | 4.24 |
| BT2142 | Mammalian cell entry related                                                                     | 0.8  | 2.24 |
| BT2151 | glycoside transferase family 2                                                                   | 0.73 | 4.24 |
| BT2152 | putative acetyltransferase                                                                       | 0.73 | 3.53 |
| BT2153 | putative Fe-S oxidoreductases                                                                    | 0.72 | 4.16 |
| BT2160 | putative regulatory protein                                                                      | 0.69 | 4.69 |
| BT2161 | 50S ribosomal protein L9                                                                         | 0.67 | 4.71 |
| BT2163 | 30S ribosomal protein S6                                                                         | 0.8  | 4.24 |
| BT2177 | putative membrane protein                                                                        | 0.71 | 4.71 |
| BT2233 | conserved hypothetical protein                                                                   | 0.8  | 3.53 |
| BT2248 | putative integral membrane protein                                                               | 0.72 | 4.69 |
| BT2254 | putative pectate lyase , PL_10                                                                   | 0.82 | 3.53 |
| BT2271 | haloacid dehalogenase-like hydrolase                                                             | 0.79 | 4.69 |
| BT2317 | conserved hypothetical protein                                                                   | 0.83 | 3.74 |
| BT2328 | conserved hypothetical protein                                                                   | 0.7  | 4.69 |
| BT2390 | putative TonB-dependent transmembrane receptor                                                   | 0.73 | 4.71 |
| BT2391 | two-component system sensor histidine kinase/response regulator, hybrid ( one component system ) | 0.59 | 2.58 |
| BT2397 | similar to Thiamin pyrophosphokinase, catalytic domain                                           | 0.83 | 2.58 |
| BT2409 | putative TonB-dependent outer membrane protein                                                   | 0.72 | 2.24 |
| BT2410 | putative acetyltransferase                                                                       | 0.78 | 2.24 |
| BT2411 | conserved hypothetical protein                                                                   | 0.6  | 4.16 |
| BT2413 | homoserine O-succinyltransferase                                                                 | 0.74 | 3.53 |
| BT2415 | aspartate aminotransferase                                                                       | 0.83 | 4.69 |



|        |                                                                  |      |      |
|--------|------------------------------------------------------------------|------|------|
| BT2416 | GTP cyclohydrolase II                                            | 0.74 | 2.24 |
| BT2458 | putative pyridine nucleotide-disulphide oxidoreductase           | 0.77 | 4.71 |
| BT2460 | SusD homolog                                                     | 0.75 | 4.71 |
| BT2497 | membrane fusion efflux protein                                   | 0.81 | 3.74 |
| BT2541 | putative calcium-transporting ATPase                             | 0.78 | 4.69 |
| BT2542 | putative haloacid dehalogenase-like hydrolase                    | 0.65 | 2.22 |
| BT2543 | riboflavin biosynthesis protein ribF, putative riboflavin kinase | 0.68 | 2.05 |
| BT2563 | polyribonucleotide nucleotidyltransferase                        | 0.65 | 2.24 |
| BT2591 | hypothetical protein                                             | 0.81 | 4.24 |
| BT2681 | alginate O-acetylation protein                                   | 0.8  | 4.24 |
| BT2682 | putative periplasmic protein                                     | 0.75 | 2.58 |
| BT2688 | outer membrane efflux protein                                    | 0.77 | 2.63 |
| BT2689 | putative TetR transcriptional regulator                          | 0.78 | 3.53 |
| BT2702 | 30S ribosomal protein S4                                         | 0.76 | 3.53 |
| BT2703 | 30S ribosomal protein S11                                        | 0.79 | 4.24 |
| BT2706 | methionine aminopeptidase                                        | 0.71 | 4.69 |
| BT2719 | 50S ribosomal protein L29                                        | 0.81 | 2.58 |
| BT2721 | 30S ribosomal protein S3                                         | 0.8  | 2.63 |
| BT2722 | 50S ribosomal protein L22                                        | 0.83 | 3.53 |
| BT2727 | 50S ribosomal protein L3                                         | 0.83 | 2.58 |
| BT2729 | elongation factor G                                              | 0.77 | 2.63 |
| BT2733 | DNA-directed RNA polymerase beta chain                           | 0.72 | 4.71 |
| BT2736 | ribosomal protein L10                                            | 0.79 | 4.71 |
| BT2737 | 50S ribosomal protein L1                                         | 0.77 | 2.58 |
| BT2738 | 50S ribosomal protein L11                                        | 0.78 | 2.29 |
| BT2739 | transcription anti-termination protein                           | 0.78 | 2.63 |
| BT2791 | uracil phosphoribosyltransferase                                 | 0.77 | 2.24 |
| BT2803 | ribokinase                                                       | 0.44 | 2.02 |

|        |                                                                                                  |      |      |
|--------|--------------------------------------------------------------------------------------------------|------|------|
| BT2804 | ribokinase                                                                                       | 0.53 | 4.69 |
| BT2823 | conserved hypothetical protein                                                                   | 0.75 | 4.71 |
| BT2826 | two-component system sensor histidine kinase/response regulator, hybrid ( one component system ) | 0.61 | 4.69 |
| BT2833 | similar to endonuclease/exonuclease/phosphatase                                                  | 0.69 | 2.02 |
| BT2834 | peptidyl-dipeptidase                                                                             | 0.75 | 3.74 |
| BT2835 | protein-export membrane protein SecD/SecE                                                        | 0.82 | 3.74 |
| BT2838 | putative lipoprotein releasing system transmembrane permease                                     | 0.61 | 3.31 |
| BT2937 | putative glycosyltransferase                                                                     | 0.79 | 4.69 |
| BT2938 | glycoside transferase family 4                                                                   | 0.77 | 3.74 |
| BT2976 | FKBP-type peptidyl-prolyl cis-trans isomerase, outer membrane protein precursor                  | 0.75 | 0    |
| BT3070 | Smf protein DNA processing chain A                                                               | 0.68 | 4.24 |
| BT3071 | similar to thioesterase family protein                                                           | 0.75 | 2.63 |
| BT3074 | Phosphoesterase, PA-phosphatase                                                                  | 0.76 | 4.69 |
| BT3119 | chloramphenicol acetyltransferase                                                                | 0.67 | 3.74 |
| BT3121 | DNA mismatch repair protein mutS                                                                 | 0.74 | 2.58 |
| BT3127 | putative transmembrane protein                                                                   | 0.61 | 2.22 |
| BT3128 | putative xanthosine triphosphate pyrophosphatase                                                 | 0.65 | 3.31 |
| BT3209 | similar to SAM dependent methyltransferase                                                       | 0.76 | 2.22 |
| BT3210 | cell division protein FtsX                                                                       | 0.69 | 2.58 |
| BT3211 | conserved hypothetical protein                                                                   | 0.69 | 2.24 |
| BT3212 | putative bacitracin resistance protein                                                           | 0.68 | 2.58 |
| BT3213 | tRNA pseudouridine synthase B                                                                    | 0.69 | 3.53 |
| BT3214 | S-adenosylmethionine:tRNA ribosyltransferase-isomerase                                           | 0.77 | 4.16 |
| BT3215 | conserved hypothetical protein                                                                   | 0.72 | 4.69 |
| BT3216 | 2-amino-4-hydroxy-6- hydroxymethylidihydropteridine                                              | 0.68 | 2.05 |
| BT3226 | uroporphyrinogen-III synthase HemD, putative .                                                   | 0.65 | 2.05 |
| BT3227 | putative ribonuclease P protein component                                                        | 0.55 | 2.58 |

|        |                                                                                                  |      |      |
|--------|--------------------------------------------------------------------------------------------------|------|------|
| BT3228 | conserved hypothetical protein                                                                   | 0.55 | 3.31 |
| BT3247 | Tetratricopeptide-like helical                                                                   | 0.79 | 4.71 |
| BT3309 | transcriptional regulator                                                                        | 0.7  | 4.71 |
| BT3317 | conserved hypothetical protein                                                                   | 0.59 | 2.02 |
| BT3318 | signal peptidase I                                                                               | 0.75 | 3.31 |
| BT3325 | conserved hypothetical protein                                                                   | 0.78 | 3.53 |
| BT3352 | haloacid dehalogenase-like hydrolase                                                             | 0.83 | 4.24 |
| BT3358 | 3-oxoacyl-[acyl-carrier-protein] synthase II                                                     | 0.77 | 3.74 |
| BT3366 | glycoside transferase family 2                                                                   | 0.8  | 4.16 |
| BT3367 | glycoside transferase family 4                                                                   | 0.72 | 4.69 |
| BT3368 | glycoside transferase family 4                                                                   | 0.74 | 4.24 |
| BT3372 | glycoside transferase family 2                                                                   | 0.56 | 3.53 |
| BT3374 | putative carbamoyl-phosphate-synthetase                                                          | 0.72 | 4.24 |
| BT3375 | aspartate aminotransferase                                                                       | 0.7  | 2.58 |
| BT3376 | nucleotide sugar transaminase                                                                    | 0.78 | 4.69 |
| BT3379 | glycoside transferase family 2                                                                   | 0.73 | 4.71 |
| BT3380 | putative membrane protein                                                                        | 0.78 | 2.63 |
| BT3465 | two-component system sensor histidine kinase/response regulator, hybrid ( one-component system ) | 0.77 | 2.22 |
| BT3473 | hypothetical protein                                                                             | 0.72 | 4.24 |
| BT3476 | Cell surface receptor IPT/TIG                                                                    | 0.83 | 4.69 |
| BT3478 | integrase                                                                                        | 0.6  | 2.58 |
| BT3516 | arabinan endo-1,5-alpha-L-arabinosidase A precursor , GH_43                                      | 0.8  | 2.24 |
| BT3576 | putative ribokinase                                                                              | 0.78 | 2.58 |
| BT3577 | putative protease                                                                                | 0.66 | 2.22 |
| BT3578 | conserved hypothetical protein                                                                   | 0.66 | 0    |
| BT3598 | beta-hexosaminidase precursor , GH_20                                                            | 0.78 | 2.63 |
| BT3606 | sugar-proton symporter                                                                           | 0.78 | 4.71 |
| BT3611 | glycyl-tRNA synthetase                                                                           | 0.8  | 2.02 |

|        |                                                                |      |      |
|--------|----------------------------------------------------------------|------|------|
| BT3612 | putative FKBP-type peptidyl-prolyl cis-trans isomerase fkpA    | 0.76 | 3.74 |
| BT3620 | AmpG protein, beta-lactamase induction signal transducer       | 0.79 | 4.24 |
| BT3688 | putative acetyltransferase                                     | 0.68 | 3.74 |
| BT3690 | putative membrane protein                                      | 0.73 | 3.31 |
| BT3691 | conserved hypothetical protein, putative membrane protein      | 0.68 | 2.58 |
| BT3692 | phosphate acetyltransferase                                    | 0.68 | 4.16 |
| BT3693 | acetate kinase                                                 | 0.75 | 4.24 |
| BT3712 | ribosomal large subunit pseudouridine synthase D               | 0.8  | 4.69 |
| BT3715 | conserved hypothetical protein                                 | 0.79 | 2.58 |
| BT3725 | putative outer membrane protein                                | 0.78 | 3.74 |
| BT3726 | undecaprenyl pyrophosphate synthetase                          | 0.79 | 4.69 |
| BT3727 | conserved hypothetical protein                                 | 0.75 | 3.74 |
| BT3730 | putative regulatory protein                                    | 0.75 | 2.05 |
| BT3732 | conserved hypothetical protein                                 | 0.7  | 2.22 |
| BT3733 | argininosuccinate lyase                                        | 0.72 | 2.58 |
| BT3740 | hypothetical protein                                           | 0.63 | 2.63 |
| BT3742 | conserved hypothetical protein                                 | 0.71 | 2.63 |
| BT3743 | conserved hypothetical protein                                 | 0.47 | 2.58 |
| BT3814 | rod shape-determining protein                                  | 0.58 | 2.58 |
| BT3815 | putative membrane protein                                      | 0.54 | 2.22 |
| BT3816 | penicillin-binding protein 2 (PBP-2)                           | 0.66 | 3.31 |
| BT3817 | rod shape-determining protein rodA                             | 0.6  | 2.58 |
| BT3818 | conserved hypothetical protein                                 | 0.67 | 0    |
| BT3820 | putative DNA polymerase III, delta subunit                     | 0.78 | 3.31 |
| BT3841 | FKBP-type peptidyl-prolyl cis-trans isomerase (trigger factor) | 0.57 | 3.53 |
| BT3842 | ATP-dependent Clp protease proteolytic subunit 2               | 0.79 | 2.02 |
| BT3843 | ATP-dependent Clp protease ATP-binding subunit                 | 0.79 | 0    |
| BT3849 | conserved hypothetical protein                                 | 0.79 | 2.58 |

|        |                                                                                       |      |      |
|--------|---------------------------------------------------------------------------------------|------|------|
| BT3850 | conserved hypothetical protein                                                        | 0.8  | 2.58 |
| BT3851 | DNA mismatch repair protein mutL                                                      | 0.82 | 4.16 |
| BT3875 | 50S ribosomal protein L13                                                             | 0.8  | 2.05 |
| BT3876 | 30S ribosomal protein S9                                                              | 0.78 | 3.53 |
| BT3877 | 30S ribosomal protein S2 (BS1)                                                        | 0.78 | 2.58 |
| BT3878 | elongation factor Ts (EF-Ts)                                                          | 0.79 | 2.63 |
| BT3883 | 2-hydroxyhepta-2,4-diene-1,7-dioate isomerase                                         | 0.81 | 2.24 |
| BT3884 | 2-C-methyl-D-erythritol 2,4-cyclodiphosphate synthase                                 | 0.68 | 1.49 |
| BT3924 | ATP-dependent DNA helicase recG                                                       | 0.73 | 2.24 |
| BT3925 | nucleoside diphosphate kinase                                                         | 0.81 | 2.24 |
| BT3926 | putative peptidase                                                                    | 0.8  | 3.53 |
| BT3928 | conserved hypothetical protein                                                        | 0.79 | 4.24 |
| BT3938 | ATP-dependent DNA helicase recQ                                                       | 0.8  | 2.22 |
| BT3944 | putative chloride channel protein                                                     | 0.76 | 4.24 |
| BT3945 | methionyl-tRNA formyltransferase                                                      | 0.81 | 4.71 |
| BT3967 | putative two-component system sensor protein histidine kinase                         | 0.76 | 4.69 |
| BT3972 | putative NTP pyrophosphohydrolase                                                     | 0.64 | 2.29 |
| BT3973 | S-adenosylmethionine:tRNA ribosyltransferase-isomerase                                | 0.61 | 3.74 |
| BT3979 | putative methyltransferase                                                            | 0.58 | 1.49 |
| BT3980 | conserved hypothetical protein                                                        | 0.65 | 2.22 |
| BT3982 | ATP-dependent exoDNAse (exonuclease V), alpha subunit - helicase superfamily I member | 0.8  | 2.58 |
| BT3995 | alanyl-tRNA synthetase                                                                | 0.65 | 2.24 |
| BT4043 | dimethyladenosine transferase                                                         | 0.81 | 4.71 |
| BT4044 | putative dolichol-P-glucose synthetase                                                | 0.73 | 4.24 |
| BT4080 | putative cell surface protein                                                         | 0.6  | 4.16 |
| BT4081 | SusC homolog                                                                          | 0.6  | 3.31 |
| BT4082 | SusD homolog                                                                          | 0.67 | 3.74 |
| BT4083 | hypothetical protein                                                                  | 0.55 | 3.74 |

|        |                                                            |      |      |
|--------|------------------------------------------------------------|------|------|
| BT4103 | putative Sec-independent protein translocase               | 0.73 | 2.58 |
| BT4104 | DNA helicase                                               | 0.64 | 2.24 |
| BT4112 | putative Fibronectin                                       | 0.72 | 4.24 |
| BT4114 | SusC homolog                                               | 0.72 | 4.69 |
| BT4187 | exo-poly-alpha-D-galacturonosidase precursor , GH_28       | 0.82 | 4.69 |
| BT4192 | lipoic acid synthetase                                     | 0.77 | 0    |
| BT4203 | tRNA delta(2)-isopentenylpyrophosphate transferase         | 0.76 | 2.58 |
| BT4207 | UDP-3-O-[3-hydroxymyristoyl] glucosamine N-acyltransferase | 0.82 | 2.58 |
| BT4208 | phosphohydrolase                                           | 0.53 | 2.24 |
| BT4209 | orotidine 5 -phosphate decarboxylase                       | 0.63 | 2.29 |
| BT4210 | peptide chain release factor 1                             | 0.72 | 3.31 |
| BT4211 | putative phosphoribosylformylglycinamide cyclo-ligase      | 0.7  | 3.74 |
| BT4218 | phosphate starvation-inducible protein, PhoH               | 0.74 | 4.71 |
| BT4238 | putative permease                                          | 0.75 | 3.53 |
| BT4257 | putative histidinol-phosphatase                            | 0.82 | 4.69 |
| BT4308 | pantoate--beta-alanine ligase                              | 0.75 | 2.02 |
| BT4315 | HPr(Ser) phosphatase                                       | 0.69 | 2.58 |
| BT4316 | putative lipoprotein                                       | 0.75 | 2.29 |
| BT4317 | putative lipoprotein protein                               | 0.75 | 2.24 |
| BT4318 | ATP-binding protein                                        | 0.78 | 2.24 |
| BT4319 | putative transmembrane protein                             | 0.79 | 4.69 |
| BT4320 | putative zinc protease                                     | 0.78 | 3.74 |
| BT4321 | 2-dehydro-3-deoxyphosphooctonate aldolase                  | 0.78 | 3.53 |
| BT4332 | similar to 3'-5' exonuclease                               | 0.81 | 2.22 |
| BT4345 | 30S ribosomal protein S1                                   | 0.69 | 2.24 |
| BT4353 | valyl-tRNA synthetase                                      | 0.79 | 4.24 |
| BT4363 | putative alkaline phosphatase                              | 0.77 | 2.22 |
| BT4366 | putative transcription regulator                           | 0.78 | 4.69 |

|        |                                                                    |      |      |
|--------|--------------------------------------------------------------------|------|------|
| BT4369 | conserved hypothetical protein                                     | 0.71 | 2.24 |
| BT4370 | putative hemolysin                                                 | 0.59 | 2.29 |
| BT4371 | peptidyl-prolyl cis-trans isomerase                                | 0.79 | 2.58 |
| BT4377 | conserved hypothetical protein                                     | 0.59 | 0    |
| BT4379 | putative oxalate:formate antiporter                                | 0.8  | 4.69 |
| BT4387 | adenylate kinase (ATP-AMP transphosphatase)                        | 0.74 | 2.58 |
| BT4388 | GTP-binding protein                                                | 0.79 | 2.58 |
| BT4389 | conserved hypothetical protein                                     | 0.73 | 3.31 |
| BT4390 | B3/4                                                               | 0.7  | 2.58 |
| BT4391 | putative metalloendopeptidase                                      | 0.78 | 4.24 |
| BT4416 | Cu <sup>2+</sup> homeostasis protein CutC                          | 0.73 | 2.24 |
| BT4472 | conserved hypothetical protein                                     | 0.73 | 3.31 |
| BT4473 | putative purine permease                                           | 0.78 | 3.31 |
| BT4558 | PP-loop                                                            | 0.62 | 2.63 |
| BT4559 | conserved hypothetical protein                                     | 0.55 | 3.74 |
| BT4560 | thiamine biosynthesis lipoprotein apbE precursor                   | 0.52 | 2.02 |
| BT4561 | conserved hypothetical protein, putative integral membrane protein | 0.47 | 2.58 |
| BT4562 | conserved hypothetical protein                                     | 0.75 | 3.31 |
| BT4563 | conserved hypothetical protein                                     | 0.72 | 2.02 |
| BT4564 | glycoside transferase family 2                                     | 0.79 | 2.24 |
| BT4565 | putative transmembrane protein                                     | 0.77 | 3.31 |
| BT4582 | amidophosphoribosyltransferase precursor                           | 0.66 | 4.16 |
| BT4587 | RNA-binding S4                                                     | 0.68 | 2.58 |
| BT4588 | peptidyl-tRNA hydrolase                                            | 0.64 | 3.31 |
| BT4593 | YbbR-like                                                          | 0.69 | 2.63 |
| BT4594 | putative dephospho-CoA kinase                                      | 0.58 | 2.58 |
| BT4595 | conserved hypothetical protein                                     | 0.74 | 4.69 |
| BT4614 | conserved hypothetical protein                                     | 0.81 | 4.71 |

|        |                                                           |      |      |
|--------|-----------------------------------------------------------|------|------|
| BT4639 | conserved hypothetical protein, putative membrane protein | 0.83 | 3.74 |
| BT4691 | conserved hypothetical protein                            | 0.78 | 4.69 |
| BT4700 | isochorismate synthase entC                               | 0.81 | 3.53 |
| BT4703 | chloromuconate cycloisomerase                             | 0.79 | 2.29 |
| BT4704 | O-succinylbenzoic acid--CoA ligase                        | 0.67 | 2.58 |
| BT4717 | integral membrane protein, putative permease              | 0.74 | 4.24 |
| BT4737 | pyruvate formate-lyase activating enzyme                  | 0.66 | 4.69 |



**Table S14. Genes showing significantly different expression within PUL's in *B. thetaiotaomicron* mono-associated Fut2- versus Fut2+ mice fed PD diet. Relative expression for these genes in *B. thetaiotaomicron* mono-associated Fut2- and Fut2+ mice fed a standard diet are also shown.**

|         |                                               | PD Diet     |            | SD Diet     |            |
|---------|-----------------------------------------------|-------------|------------|-------------|------------|
| Gene ID | Gene Name                                     | Fold Change | q-value(%) | Fold Change | q-value(%) |
| BT0206  | SusC homolog                                  | 0.37        | 2.58       | 0.93        | 32.83      |
| BT0207  | SusD homolog                                  | 0.39        | 2.58       | 0.69        | 6.48       |
| BT0208  | hypothetical protein                          | 0.35        | 2.58       | 0.70        | 6.48       |
| BT0209  | hypothetical protein                          | 0.42        | 3.74       | 0.75        | 10.61      |
| BT0210  | leucine-rich repeat protein, function unknown | 0.37        | 5.69       | 0.81        | 25.68      |
| BT0211  | Leucine-rich repeat                           | 0.45        | 6.57       | 0.78        | 17.54      |
| BT0317  | SusC homolog                                  | 1.29        | 3.28       | 1.14        | 12.21      |
| BT0318  | SusD homolog                                  | 1.36        | 3.53       | 1.19        | 10.61      |
| BT0319  | conserved hypothetical protein                | 1.33        | 2.22       | 1.22        | 3.46       |
| BT0434  | Pyridine nucleotide-disulphide o              | 1.47        | 1.49       | 1.29        | 9.07       |
| BT0435  | Twin-arginine translocation pathway signal    | 1.56        | 2.22       | 1.23        | 21.84      |
| BT0436  | arabinose-proton symporter                    | 1.58        | 2.22       | 1.23        | 18.83      |
| BT0437  | N-acylglucosamine 2-epimerase                 | 1.83        | 4.24       | 1.00        | 33.93      |
| BT0439  | SusC homolog                                  | 1.83        | 2.22       | 0.90        | 26.07      |
| BT0440  | SusD homolog                                  | 1.73        | 4.16       | 0.90        | 27.56      |
| BT0441  | putative chitobiase                           | 1.66        | 4.69       | 1.02        | 33.93      |
| BT0442  | glycerophosphoryl diester phosphodiesterase   | 1.62        | 5.69       | 1.08        | 33.93      |
| BT0444  | hypothetical protein                          | 1.51        | 2.22       | 1.06        | 33.93      |
| BT1273  | L-fucose isomerase                            | 0.63        | 3.53       | 0.67        | 7.39       |
| BT1274  | L-fuculose-1-phosphate aldolase               | 0.64        | 3.74       | 0.80        | 5.56       |
| BT1275  | L-fuculose kinase                             | 0.64        | 2.58       | 0.63        | 5.43       |
| BT1276  | mutarotase                                    | 0.62        | 2.24       | 0.56        | 3.34       |
| BT1277  | L-fucose permease                             | 0.62        | 2.58       | 0.66        | 0.00       |
| BT1551  | Peptidase M1A and M12B                        | 0.51        | 2.58       | 0.41        | 2.26       |

|        |                                                                |      |      |      |       |
|--------|----------------------------------------------------------------|------|------|------|-------|
| BT1552 | SusC homolog                                                   | 0.53 | 3.74 | 0.61 | 4.40  |
| BT1553 | SusD homolog                                                   | 0.43 | 3.74 | 0.39 | 3.03  |
| BT1617 | RNA polymerase ECF-type sigma factor                           | 0.76 | 2.22 | 0.61 | 4.40  |
| BT1618 | putative anti-sigma factor                                     | 0.61 | 3.74 | 1.24 | 27.56 |
| BT1619 | SusC homolog                                                   | 0.51 | 4.71 | 0.94 | 32.83 |
| BT1620 | SusD homolog                                                   | 0.49 | 4.69 | 0.94 | 30.57 |
| BT1621 | beta-hexosaminidase precursor , GH_20                          | 0.51 | 6.57 | 0.96 | 32.83 |
| BT1622 | N-acetylgalactosamine-6-sulfatase precursor                    | 0.58 | 6.57 | 1.07 | 32.14 |
| BT2392 | NHL repeat-containing protein                                  | 2.86 | 3.53 | 0.97 | 32.83 |
| BT2393 | SusC homolog                                                   | 3.09 | 3.28 | 0.94 | 30.57 |
| BT2394 | SusD homolog                                                   | 3.77 | 2.22 | 0.85 | 16.10 |
| BT2395 | hypothetical protein                                           | 3.66 | 2.22 | 0.76 | 12.21 |
| BT3086 | alpha-glucosidase II , GH_31                                   | 3.20 | 0.00 | 0.99 | 32.83 |
| BT3087 | cycloisomaltooligosaccharide glucanotransferase , GH_66        | 2.24 | 0.00 | 1.01 | 33.93 |
| BT3088 | conserved hypothetical protein                                 | 2.56 | 0.00 | 0.89 | 17.54 |
| BT3089 | SusD homolog                                                   | 2.03 | 0.00 | 0.97 | 32.83 |
| BT3090 | SusC homolog                                                   | 2.62 | 0.00 | 0.94 | 30.57 |
| BT3235 | conserved hypothetical protein                                 | 3.23 | 4.69 | 0.76 | 18.83 |
| BT3236 | conserved hypothetical protein                                 | 3.28 | 4.71 | 0.66 | 12.21 |
| BT3237 | Peptidase M, neutral zinc metallopeptidases, zinc-binding site | 3.10 | 4.69 | 0.66 | 12.21 |
| BT3238 | SusD homolog                                                   | 3.13 | 5.69 | 0.63 | 10.61 |
| BT3239 | SusC homolog                                                   | 2.82 | 4.71 | 0.71 | 7.39  |
| BT3854 | SusC homolog                                                   | 1.32 | 2.63 | 0.97 | 32.83 |
| BT3855 | SusD homolog                                                   | 1.29 | 4.24 | 0.91 | 30.57 |
| BT3857 | Flavodoxin                                                     | 1.24 | 2.22 | 0.90 | 26.07 |
| BT4038 | SusD homolog                                                   | 1.43 | 1.65 | 0.86 | 25.68 |
| BT4039 | SusC homolog                                                   | 1.38 | 2.16 | 0.84 | 25.68 |
| BT4040 | putative galactose oxidase precursor                           | 1.39 | 2.22 | 0.82 | 17.54 |

|        |                                         |      |      |      |       |
|--------|-----------------------------------------|------|------|------|-------|
| BT4241 | beta-galactosidase , GH_2               | 1.44 | 3.28 | 0.60 | 12.21 |
| BT4242 | putative transporter                    | 1.37 | 3.74 | 0.66 | 14.85 |
| BT4243 | Hexosaminidase, GH_109                  | 1.49 | 2.05 | 0.91 | 26.07 |
| BT4244 | Coagulation factor 5/8 type, C-terminal | 2.44 | 0.00 | 0.79 | 28.86 |
| BT4245 | Coagulation factor 5/8 type, C-terminal | 2.08 | 1.49 | 0.92 | 32.83 |
| BT4246 | SusD homolog                            | 1.98 | 2.22 | 0.80 | 28.97 |
| BT4247 | SusC homolog                            | 1.80 | 1.65 | 0.87 | 30.57 |
| BT4248 | putative anti-sigma factor              | 2.13 | 4.24 | 1.48 | 5.43  |
